# Supplementary material for: Transcriptome Profile at Different Physiological Stages Reveals Potential Mode for Curly Fleece in Chinese Tan Sheep
Source: PLoS One. 2013 Aug 26;8(8):e71763. doi: 10.1371/journal.pone.0071763 (PMC3753335; doi:10.1371/journal.pone.0071763)
Supplement: Table S4 — Summary of Illumina sequencing and mapping. (XLSX) [file pone.0071763.s007.xlsx]

## Sheet: Sheet1
Table S4. Summary of Illumina sequencing and mapping
Sample name	L1	L2	A1	A2
Total reads	57971828	59244494	55793044	48534866
Total mapped	46385890(80.01%)	48393158(81.68%)	45981206(82.41%)	39257549(80.89%)
Multiple mapped	1974218(3.41%)	2334086(3.94%)	2010771(3.6%)	1685690(3.47%)
Uniquely mapped	44411672(76.61%)	46059072(77.74%)	43970435(78.81%)	37571859(77.41%)
Reads map to '+'	22232865(38.35%)	23061747(38.93%)	21991146(39.42%)	18807471(38.75%)
Reads map to '-'	22178807(38.26%)	22997325(38.82%)	21979289(39.39%)	18764388(38.66%)
Total reads: The total amount of clean reads.
Total mapped: The total reads amount mapped to the reference genome/sequence.
Multi-mapped: Tthe reads amount mapped to the reference genome/sequence more than one site.
Uniq-mapped: The reads amount mapped to the reference genome/sequence only one site.
Reads map to ‘+’ : The reads amount mapped to the forward strand of reference genome/sequence.
Reads map to ‘-’ : The reads amount mapped to the reverse strand of reference genome/sequence.
