# Supplementary material for: Transcriptome Profile at Different Physiological Stages Reveals Potential Mode for Curly Fleece in Chinese Tan Sheep
Source: PLoS One. 2013 Aug 26;8(8):e71763. doi: 10.1371/journal.pone.0071763 (PMC3753335; doi:10.1371/journal.pone.0071763)
Supplement: Table S7 — Gene Ontology annotation of DE genes between two groups. (XLSX) [file pone.0071763.s010.xlsx]

## Sheet: Go annotation
Table S7. Gene Ontology annotation of DE genes between two groups
Category	Term	Count	%	PValue	Genes	List Total	Pop Hits	Pop Total	Fold Enrichment	Bonferroni	Benjamini	FDR
GOTERM_BP_FAT	GO:0006936~muscle contraction	18	5.27859	9.29863e-09	KNG1, UTS2, MYBPC2, ACTA1, TNNC2, MYBPC1, MYL1, TTN, CACNA1S, MYOT, TNNI2, P2RX6, MYOM2, RYR1, CACNA1H, SMPX, KBTBD10, MB	269	153	13528	5.91647	1.62818e-05	1.62818e-05	1.57391e-05
GOTERM_BP_FAT	GO:0003012~muscle system process	18	5.27859	3.80664e-08	KNG1, UTS2, MYBPC2, ACTA1, TNNC2, MYBPC1, MYL1, TTN, CACNA1S, MYOT, TNNI2, P2RX6, MYOM2, RYR1, CACNA1H, SMPX, KBTBD10, MB	269	168	13528	5.38821	6.6652e-05	3.33265e-05	6.44319e-05
SP_PIR_KEYWORDS	muscle protein	11	3.22581	8.27048e-08	MYBPC2, ACTA1, MYOM2, TNNC2, MYBPC1, MYL1, MYLPF, CASQ1, MYOT, TNNI2, MB	338	60	19235	10.4332	3.21717e-05	3.21717e-05	0.000114889
SP_PIR_KEYWORDS	signal	95	27.8592	2.50513e-07	LYPD2, UTS2, SLURP1, MMP9, KIAA1324, ARSJ, HP, SPINK4, DLK1, ASAH1, LGR4, CXCL10, ACVR1C, SPINK9, ART3, WISP2, RNASE9, SAA1, SEMA7A, LTF, PRSS35, NEGR1, IFNGR2, KNG1, GPR97, CRISP3, HHIPL2, HYAL2, STC2, PCDHB6, LYZ, PTPRR, FGF21, TCN1, MMP13, TMEM207, MMP12, PROC, GABRR2, SCGB1D1, CPE, CARTPT, GLB1L2, CASQ1, JAM3, SCGB2A2, WFDC2, ADAMTSL1, AMTN, ITGAE, HSD17B13, ADAMTS16, CXCL9, SORCS1, CTSL1, PK…	338	3250	19235	1.66347	9.7445e-05	4.87237e-05	0.000347999
UP_SEQ_FEATURE	signal peptide	95	27.8592	2.9042e-07	LYPD2, UTS2, SLURP1, MMP9, KIAA1324, ARSJ, HP, SPINK4, DLK1, ASAH1, LGR4, CXCL10, ACVR1C, SPINK9, ART3, WISP2, RNASE9, SAA1, SEMA7A, LTF, PRSS35, NEGR1, IFNGR2, KNG1, GPR97, CRISP3, HHIPL2, HYAL2, STC2, PCDHB6, LYZ, PTPRR, FGF21, TCN1, MMP13, TMEM207, MMP12, PROC, GABRR2, SCGB1D1, CPE, CARTPT, GLB1L2, CASQ1, JAM3, SCGB2A2, WFDC2, ADAMTSL1, AMTN, ITGAE, HSD17B13, ADAMTS16, CXCL9, SORCS1, CTSL1, PK…	337	3250	19113	1.65783	0.00043989	0.00043989	0.000483123
GOTERM_CC_FAT	GO:0043292~contractile fiber	14	4.10557	1.60579e-06	ACTA1, TNNC2, MYBPC1, MYL1, MYLPF, ANKRD1, TTN, CACNA1S, MYOT, TNNI2, ANK1, ATP2A1, RYR1, ABRA	271	121	12782	5.45723	0.00044631	0.00044631	0.00212086
SP_PIR_KEYWORDS	skeletal muscle	7	2.05279	2.85254e-06	MYOM2, TNNC2, MYBPC1, RYR1, CASQ1, CACNA1S, TNNI2	338	24	19235	16.5982	0.00110902	0.000369811	0.00396251
GOTERM_CC_FAT	GO:0030016~myofibril	13	3.81232	3.80412e-06	ACTA1, TNNC2, MYBPC1, MYL1, ANKRD1, TTN, CACNA1S, MYOT, TNNI2, ANK1, ATP2A1, RYR1, ABRA	271	111	12782	5.52395	0.00105699	0.000528633	0.00502426
GOTERM_CC_FAT	GO:0044449~contractile fiber part	13	3.81232	4.59167e-06	ACTA1, TNNC2, MYL1, MYLPF, ANKRD1, TTN, CACNA1S, MYOT, TNNI2, ANK1, ATP2A1, RYR1, ABRA	271	113	12782	5.42618	0.00127567	0.000425405	0.00606438
GOTERM_CC_FAT	GO:0030017~sarcomere	12	3.51906	6.7177e-06	ANK1, ACTA1, TNNC2, ATP2A1, MYL1, RYR1, ABRA, ANKRD1, TTN, CACNA1S, MYOT, TNNI2	271	98	12782	5.77543	0.00186578	0.000466773	0.0088722
GOTERM_BP_FAT	GO:0006631~fatty acid metabolic process	16	4.69208	9.48158e-06	CPT1B, ADIPOQ, ACOT4, PEX7, LEP, AKR1C3, AWAT2, ACSM3, CYP4A11, ACSM1, ACSL1, FABP4, CYP4F3, LIPC, SLC27A2, ACSL5	269	198	13528	4.06384	0.0164653	0.00551882	0.0160475
SP_PIR_KEYWORDS	lipid metabolism	13	3.81232	1.46097e-05	CPT1B, MOGAT1, AWAT2, ACSM3, DGAT2L6, FAR2, ACSM1, ACSL1, PLIN1, HSD17B6, LIPC, SLC27A2, ACSL5	338	151	19235	4.89939	0.0056671	0.0014198	0.0202931
GOTERM_CC_FAT	GO:0016529~sarcoplasmic reticulum	8	2.34604	1.49723e-05	CACNA2D1, ANK1, SLN, PYGM, ATP2A1, RYR1, CASQ1, CACNA1S	271	39	12782	9.67509	0.00415369	0.000832121	0.0197732
SP_PIR_KEYWORDS	microsome	11	3.22581	1.71477e-05	CYP2U1, CYP4A11, UGT1A6, NCEH1, ACSL1, CYP2B6, HSD17B6, CYP4F3, SRD5A2, OAS2, RDH16	338	106	19235	5.90558	0.00664833	0.00133322	0.0238181
SP_PIR_KEYWORDS	disease mutation	52	15.2493	1.8609e-05	SLURP1, USH1G, RPE65, ANKRD1, TTN, ASAH1, PEX7, ANK1, SRD5A2, IFNGR2, CHAT, WWOX, HPD, YARS, ACTA1, FBP1, LYZ, BBS12, MMP13, ARHGAP26, PROC, BSND, MTMR14, LRAT, SIX1, RYR1, CARTPT, PHKA2, ABCA3, MYOT, UGT1A6, C1QTNF3, ALB, ENO3, C2, GFI1, TBX5, PHYH, CAPN3, CACNA1S, ADIPOQ, ABCB4, TNNI2, LEP, VWF, GLA, PYGM, TMEM43, NPHS2, ATP2A1, CACNA1H, LIPC	338	1591	19235	1.85998	0.00721284	0.00120577	0.0258475
GOTERM_CC_FAT	GO:0016528~sarcoplasm	8	2.34604	2.11093e-05	CACNA2D1, ANK1, SLN, PYGM, ATP2A1, RYR1, CASQ1, CACNA1S	271	41	12782	9.20313	0.00585127	0.000977598	0.0278771
SP_PIR_KEYWORDS	Secreted	54	15.8358	2.22547e-05	UTS2, SLURP1, S100A7, MMP9, IL18, ARSJ, HP, SPINK4, CXCL10, SPINK9, WISP2, RNASE9, SAA1, LTF, PRSS35, KNG1, HHIPL2, CRISP3, STC2, FGF21, TCN1, MMP13, MMP12, SCGB1D1, CPE, CARTPT, GLB1L2, WFDC2, ADAMTSL1, AMTN, HSD17B13, ADAMTS16, CXCL9, ZG16B, C1QTNF3, NPTX2, ALB, SCG5, C2, SPATA6, ANGPTL2, PM20D1, IL1RN, CCL19, ADIPOQ, EPHA3, LEP, VWF, LYG2, CXCL13, PRSS27, CP, LIPC, AGR2	338	1689	19235	1.81945	0.00861981	0.00123598	0.0309106
GOTERM_BP_FAT	GO:0006941~striated muscle contraction	8	2.34604	3.06134e-05	TNNC2, MYL1, SMPX, TTN, KBTBD10, CACNA1S, TNNI2, MB	269	46	13528	8.74608	0.0521934	0.0133118	0.0518042
GOTERM_CC_FAT	GO:0005576~extracellular region	69	20.2346	3.38346e-05	UTS2, SLURP1, S100A7, MMP9, IL18, ARSJ, HP, SPINK4, CNP, DLK1, TTN, CXCL10, SPINK9, WISP2, RNASE9, SAA1, LTF, PRSS35, KNG1, HHIPL2, CRISP3, YARS, STC2, LYZ, FGF21, TCN1, MMP13, DHRS7C, MMP12, PROC, SCGB1D1, CPE, CARTPT, GLB1L2, SCGB2A2, WFDC2, SORD, ADAMTSL1, AMTN, HSD17B13, ADAMTS16, CXCL9, CTSL1, APLP1, ZG16B, C1QTNF3, ALB, NPTX2, SCG5, C2, SPATA6, ANGPTL2, CD27, IL1RN, PM20D1, NTNG1, CCL19, CH…	271	2010	12782	1.61913	0.00936209	0.00134284	0.0446787
GOTERM_BP_FAT	GO:0051146~striated muscle cell differentiation	10	2.93255	5.98946e-05	ACTA1, XIRP1, TBX5, AVPR1A, CACNA1H, MYOZ1, TTN, CAPN3, CACNA1S, CHAT	269	88	13528	5.71477	0.0995662	0.0207573	0.101331
SP_PIR_KEYWORDS	disulfide bond	78	22.8739	0.000120054	UTS2, SLURP1, S100A7, MMP9, ATP1B4, KIAA1324, HP, SPINK4, DLK1, TTN, LGR4, CXCL10, SPINK9, ASGR1, ART3, RNASE9, SEMA7A, LTF, PRSS35, NEGR1, KNG1, CRISP3, HYAL2, STC2, LYZ, TCN1, MMP13, LDLRAD1, MMP12, PROC, ST6GALNAC1, GABRR2, LPAR5, CCR3, OR6V1, CARTPT, JAM3, PTAFR, WFDC2, ADAMTSL1, ITGAE, KEL, ADAMTS16, CXCL9, PKD1L2, CTSL1, NPTX2, ALB, NPM1, BAI1, CD22, SCG5, CD4, C2, ANGPTL2, SELPLG, CD27, GU…	338	2924	19235	1.51807	0.0456301	0.00582099	0.166644
SP_PIR_KEYWORDS	glycoprotein	106	31.085	0.000121986	SLC9A9, LYPD2, AQP8, MMP9, ATP1B4, KIAA1324, DLK1, RNASE9, SEMA7A, NEGR1, CRISP3, HHIPL2, STC2, PTPRR, MRGPRD, TCN1, GABRR2, CPE, LPAR5, CCR3, RYR1, SCGB2A2, WFDC2, ADAMTSL1, AMTN, KEL, ITGAE, SLC38A6, SORCS1, CTSL1, ALB, BAI1, LRFN5, ANGPTL2, GUCY2F, CACNA2D1, ST6GAL2, IL1RN, CHI3L2, PCDH17, CACNA1S, ABCB4, EPHA3, P2RX6, AVPR1A, CACNA1H, ALG11, STEAP4, SLURP1, ARSJ, HP, ASAH1, LGR4, ASGR1, ART3,…	338	4318	19235	1.39701	0.0463472	0.00525897	0.169324
KEGG_PATHWAY	hsa03320:PPAR signaling pathway	9	2.6393	0.000141916	CPT1B, CYP4A11, ACSL1, PLIN1, RXRG, FABP4, SLC27A2, ADIPOQ, ACSL5	116	69	5085	5.71777	0.0157701	0.0157701	0.160755
GOTERM_MF_FAT	GO:0008307~structural constituent of muscle	7	2.05279	0.000150313	MYBPC2, MYOM2, MYBPC1, MYL1, MYLPF, TTN, MYOT	254	42	12983	8.51903	0.0746354	0.0746354	0.217196
GOTERM_CC_FAT	GO:0005792~microsome	16	4.69208	0.000155613	CYP2U1, CPT1B, NCEH1, CYP2B6, AQP8, OAS2, CYP4A11, UGT1A6, ACSL1, LRAT, ATP2A1, HSD17B6, CYP4F3, SRD5A2, RDH16, ACSL5	271	237	12782	3.18421	0.0423413	0.00539338	0.205335
GOTERM_BP_FAT	GO:0016042~lipid catabolic process	13	3.81232	0.000172392	CPT1B, NCEH1, ADIPOQ, PEX7, LEP, DDHD1, GLA, PLIN1, PLA2G4F, HSD17B6, SRD5A2, LIPC, PLA2G4D	269	173	13528	3.77901	0.260576	0.0490692	0.291394
GOTERM_CC_FAT	GO:0042598~vesicular fraction	16	4.69208	0.000213854	CYP2U1, CPT1B, NCEH1, CYP2B6, AQP8, OAS2, CYP4A11, UGT1A6, ACSL1, LRAT, ATP2A1, HSD17B6, CYP4F3, SRD5A2, RDH16, ACSL5	271	244	12782	3.09286	0.0577246	0.00658463	0.282084
GOTERM_BP_FAT	GO:0007517~muscle organ development	14	4.10557	0.000301828	CPT1B, ACTA1, TBX5, MYL1, RXRG, MYLPF, TTN, CAPN3, CACNA1S, CXCL10, XIRP1, SIX1, CACNA1H, CHAT	269	211	13528	3.33677	0.410559	0.0727309	0.509654
GOTERM_CC_FAT	GO:0005783~endoplasmic reticulum	37	10.8504	0.000531887	CYP2U1, CYP2B6, S100A7, RSAD2, OAS2, GPRC5A, UGT1A6, FAR2, DGAT2L6, ANK1, ACSL1, SLN, PIGM, HSD17B6, CD4, SRD5A2, IFNGR2, ACSL5, HPD, CACNA2D1, MOGAT1, NCEH1, ADIPOQ, CACNA1S, AWAT2, CYP4A11, VWF, LRAT, PYGM, TMEM43, ATP2A1, RYR1, CYP4F3, RDH16, AGR2, SLC27A2, CASQ1	271	960	12782	1.81786	0.137486	0.0146815	0.700226
GOTERM_CC_FAT	GO:0044421~extracellular region part	37	10.8504	0.000531887	UTS2, SLURP1, ADAMTSL1, SORD, AMTN, MMP9, IL18, ADAMTS16, CXCL9, CNP, HP, DLK1, CXCL10, APLP1, ALB, SAA1, C2, ANGPTL2, KNG1, CRISP3, YARS, IL1RN, NTNG1, LYZ, CHI3L2, CCL19, MMP13, ADIPOQ, MMP12, LEP, SCGB1D1, VWF, CXCL13, CARTPT, CP, LIPC, WFDC2	271	960	12782	1.81786	0.137486	0.0146815	0.700226
GOTERM_BP_FAT	GO:0055002~striated muscle cell development	7	2.05279	0.000541888	ACTA1, XIRP1, MYOZ1, TTN, CAPN3, CACNA1S, CHAT	269	52	13528	6.7698	0.612912	0.111871	0.913265
UP_SEQ_FEATURE	disulfide bond	73	21.4076	0.000575446	UTS2, SLURP1, S100A7, MMP9, ATP1B4, KIAA1324, HP, SPINK4, DLK1, TTN, LGR4, CXCL10, SPINK9, ASGR1, ART3, RNASE9, SEMA7A, LTF, PRSS35, NEGR1, KNG1, CRISP3, HYAL2, LYZ, TCN1, MMP13, LDLRAD1, MMP12, ST6GALNAC1, PROC, GABRR2, LPAR5, CCR3, CARTPT, OR6V1, JAM3, PTAFR, WFDC2, ADAMTSL1, ITGAE, KEL, ADAMTS16, CXCL9, PKD1L2, CTSL1, ALB, NPTX2, BAI1, CD22, SCG5, CD4, C2, ANGPTL2, SELPLG, CD27, GUCY2F, ST6GAL…	337	2819	19113	1.46868	0.581907	0.353399	0.952982
UP_SEQ_FEATURE	glycosylation site:N-linked (GlcNAc...)	99	29.0323	0.00062554	SLC9A9, LYPD2, AQP8, MMP9, ATP1B4, KIAA1324, DLK1, RNASE9, SEMA7A, NEGR1, CRISP3, HHIPL2, STC2, PTPRR, MRGPRD, TCN1, GABRR2, CPE, LPAR5, RYR1, SCGB2A2, WFDC2, ADAMTSL1, KEL, ITGAE, SLC38A6, SORCS1, CTSL1, BAI1, LRFN5, ANGPTL2, CACNA2D1, ST6GAL2, IL1RN, CHI3L2, PCDH17, CACNA1S, ABCB4, EPHA3, P2RX6, AVPR1A, CACNA1H, ALG11, STEAP4, ARSJ, HP, ASAH1, LGR4, ASGR1, ART3, TRPV5, LTF, PRSS35, IFNGR2, KNG1…	337	4129	19113	1.35984	0.612481	0.270938	1.03554
GOTERM_CC_FAT	GO:0005615~extracellular space	29	8.5044	0.000627577	UTS2, SLURP1, SORD, MMP9, IL18, CXCL9, HP, CNP, DLK1, CXCL10, SAA1, ALB, C2, ANGPTL2, KNG1, YARS, IL1RN, LYZ, CHI3L2, CCL19, ADIPOQ, MMP13, LEP, SCGB1D1, CXCL13, CARTPT, CP, LIPC, WFDC2	271	685	12782	1.99681	0.160141	0.0157404	0.825719
GOTERM_BP_FAT	GO:0042692~muscle cell differentiation	10	2.93255	0.000672135	ACTA1, XIRP1, TBX5, AVPR1A, CACNA1H, MYOZ1, TTN, CAPN3, CACNA1S, CHAT	269	121	13528	4.1562	0.691892	0.122617	1.1316
GOTERM_BP_FAT	GO:0030239~myofibril assembly	5	1.46628	0.000690974	ACTA1, XIRP1, MYOZ1, TTN, CAPN3	269	21	13528	11.9738	0.701896	0.113994	1.16314
GOTERM_BP_FAT	GO:0044242~cellular lipid catabolic process	8	2.34604	0.000754898	LEP, CPT1B, GLA, PLA2G4F, LIPC, ADIPOQ, PLA2G4D, PEX7	269	76	13528	5.29368	0.733485	0.113267	1.27011
GOTERM_BP_FAT	GO:0055001~muscle cell development	7	2.05279	0.000809046	ACTA1, XIRP1, MYOZ1, TTN, CAPN3, CACNA1S, CHAT	269	56	13528	6.28625	0.757612	0.111394	1.36062
GOTERM_MF_FAT	GO:0015645~fatty-acid ligase activity	4	1.17302	0.00107464	ACSM3, ACSL1, SLC27A2, ACSL5	254	11	12983	18.587	0.425821	0.242254	1.54319
UP_SEQ_FEATURE	metal ion-binding site:Calcium 1	6	1.75953	0.00111847	ASGR1, NPTX2, MMP9, ATP2A1, MMP13, MMP12	337	45	19113	7.56202	0.816479	0.345482	1.84443
KEGG_PATHWAY	hsa00830:Retinol metabolism	7	2.05279	0.00125153	AWAT2, CYP4A11, UGT1A6, LRAT, CYP2B6, RPE65, RDH16	116	54	5085	5.68247	0.130867	0.067727	1.40957
GOTERM_CC_FAT	GO:0000267~cell fraction	39	11.437	0.00129092	CYP2U1, SORD, AQP8, CYP2B6, CNP, DLK1, OAS2, ABCA3, CTSL1, APLP1, UGT1A6, WISP2, ACSL1, ENO3, HSD17B6, SRD5A2, SELPLG, CD27, ACSL5, CPT1B, YARS, MOGAT1, NCEH1, STMN2, FBP1, FGF21, S100A12, ABCB4, CYP4A11, P2RX6, LRAT, PYGM, CXCL13, ATP2A1, RYR1, FABP4, ABCC4, CYP4F3, RDH16	271	1083	12782	1.6985	0.3017	0.0294822	1.69164
GOTERM_MF_FAT	GO:0019825~oxygen binding	6	1.75953	0.0014203	CYP2U1, CYP4A11, ALB, CYP2B6, CYP4F3, MB	254	43	12983	7.13221	0.519724	0.216876	2.03482
GOTERM_CC_FAT	GO:0042579~microbody	9	2.6393	0.00150443	FAR2, ACSL1, C1QTNF3, NOS2, SLC27A2, PHYH, ACOT4, ACSL5, PEX7	271	103	12782	4.12131	0.341998	0.0316831	1.96887
GOTERM_CC_FAT	GO:0005777~peroxisome	9	2.6393	0.00150443	FAR2, ACSL1, C1QTNF3, NOS2, SLC27A2, PHYH, ACOT4, ACSL5, PEX7	271	103	12782	4.12131	0.341998	0.0316831	1.96887
GOTERM_MF_FAT	GO:0016877~ligase activity, forming carbon-sulfur bonds	5	1.46628	0.0017364	ACSM3, ACSM1, ACSL1, SLC27A2, ACSL5	254	27	12983	9.46559	0.592111	0.200837	2.48241
SP_PIR_KEYWORDS	nadp	10	2.93255	0.00175336	AKR1C3, CYP2U1, FAR2, ART3, KCNAB2, HSD17B1, CYP4F3, NOS2, SDR16C6, WWOX	338	156	19235	3.64797	0.494727	0.0659877	2.40834
SP_PIR_KEYWORDS	calcium	27	7.91789	0.00201889	TNNC2, S100A7, ITGAE, MMP9, ARSJ, TTN, ASGR1, NPTX2, TRPV5, NOS2, CACNA2D1, PCDHB6, MYLPF, PCDH17, CACNA1S, CAPN3, MMP13, MMP12, S100A12, PROC, CAPN14, ATP2A1, RYR1, PLA2G4F, CACNA1H, CASQ1, PLA2G4D	338	803	19235	1.91348	0.544401	0.0689734	2.76833
INTERPRO	IPR000873:AMP-dependent synthetase and ligase	5	1.46628	0.00204914	ACSM3, ACSM1, ACSL1, SLC27A2, ACSL5	305	30	16659	9.10328	0.727041	0.727041	3.00562
GOTERM_BP_FAT	GO:0031032~actomyosin structure organization	5	1.46628	0.00212018	ACTA1, XIRP1, MYOZ1, TTN, CAPN3	269	28	13528	8.98035	0.975678	0.248643	3.5287
SP_PIR_KEYWORDS	inflammatory response	7	2.05279	0.00230876	KNG1, CXCL13, CXCL9, CCL19, S100A12, CHST1, CXCL10	338	77	19235	5.17348	0.593082	0.0721904	3.1599
GOTERM_BP_FAT	GO:0007218~neuropeptide signaling pathway	8	2.34604	0.00246226	GPR97, CPE, GPR110, BAI1, SORCS1, CARTPT, SCG5, PKD1L2	269	93	13528	4.32602	0.986657	0.265333	4.08695
GOTERM_BP_FAT	GO:0014706~striated muscle tissue development	9	2.6393	0.0025222	ACTA1, XIRP1, TBX5, SIX1, RXRG, MYLPF, TTN, CACNA1S, CHAT	269	119	13528	3.80344	0.987989	0.255317	4.18445
GOTERM_BP_FAT	GO:0006952~defense response	24	7.03812	0.00261279	KNG1, CRISP3, S100A7, IL1RN, LYZ, CXCL9, RSAD2, CCL19, NLRX1, HP, ANKRD1, S100A12, CHST1, CXCL10, EPHA3, SAA1, CXCL13, CCR3, LTF, C2, NOS2, MX1, MX2, PTAFR	269	615	13528	1.96254	0.989755	0.248971	4.33163
GOTERM_BP_FAT	GO:0015674~di-, tri-valent inorganic cation transport	11	3.22581	0.00269565	STEAP4, CACNA2D1, SLN, ATP2A1, TRPA1, RYR1, TRPV5, CACNA1H, LTF, TCN1, CACNA1S	269	176	13528	3.14312	0.991142	0.242723	4.46607
UP_SEQ_FEATURE	metal ion-binding site:Calcium 2	6	1.75953	0.00276092	ASGR1, NPTX2, MMP9, ATP2A1, MMP13, MMP12	337	55	19113	6.18711	0.984832	0.567303	4.49509
SP_PIR_KEYWORDS	ion transport	21	6.15836	0.00312185	SLC9A9, STEAP4, CACNA2D1, KCNAB2, ATP1B4, SLC38A6, GRIA4, TCN1, CACNA1S, PKD1L2, GABRR2, SLCO1B3, SLCO1A2, P2RX6, ATP2A1, TRPV5, RYR1, CACNA1H, LTF, CP, SCNN1D	338	578	19235	2.0676	0.703675	0.0893179	4.2505
SMART	SM00408:IGc2	11	3.22581	0.00318366	ADAMTSL1, MYBPC2, MYOM2, MYBPC1, ALPK2, CD22, LRFN5, TTN, NEGR1, JAM3, MYOT	160	205	9079	3.04479	0.351873	0.351873	3.67406
SP_PIR_KEYWORDS	copper	6	1.75953	0.00318371	STEAP4, ALB, CP, APLP1, S100A12, MT3	338	57	19235	5.99035	0.710742	0.0847908	4.33301
INTERPRO	IPR003962:Fibronectin, type III subdomain	5	1.46628	0.00327514	MYBPC2, MYOM2, MYBPC1, TTN, EPHA3	305	34	16659	8.0323	0.87464	0.645938	4.76338
GOTERM_BP_FAT	GO:0060537~muscle tissue development	9	2.6393	0.00341876	ACTA1, XIRP1, TBX5, SIX1, RXRG, MYLPF, TTN, CACNA1S, CHAT	269	125	13528	3.62088	0.997513	0.283329	5.63178
GOTERM_CC_FAT	GO:0005865~striated muscle thin filament	4	1.17302	0.00351332	ACTA1, TNNC2, TTN, TNNI2	271	15	12782	12.5776	0.624096	0.067501	4.54208
GOTERM_BP_FAT	GO:0055082~cellular chemical homeostasis	17	4.98534	0.00379633	KNG1, CCL19, HP, ADIPOQ, XIRP1, PYGM, SAA1, CXCL13, CCR3, ATP2A1, RYR1, AVPR1A, CARTPT, LTF, CP, IFI6, MT3	269	380	13528	2.24981	0.998719	0.295683	6.23511
INTERPRO	IPR013098:Immunoglobulin I-set	9	2.6393	0.00384443	ADAMTSL1, MYBPC2, MYOM2, MYBPC1, ALPK2, LRFN5, TTN, NEGR1, MYOT	305	138	16659	3.56215	0.912684	0.556359	5.56945
UP_SEQ_FEATURE	sequence variant	235	68.915	0.00447906	SLC9A9, LYPD2, UTS2, S100A7, AQP8, ATP1B4, SEMA7A, WWOX, TMEM14A, CRISP3, LYRM2, YARS, GBP6, GBP5, PTPRR, CCDC136, IFI44, DEPDC1, SPAG6, CCR3, RYR1, RTP4, AMTN, CYP2B6, KEL, SORCS1, KBTBD5, MAML3, GUCY2F, ST6GAL2, IL1RN, CHI3L2, IFI27L1, TNNI2, EPHA3, TNKS1BP1, ZFHX4, NIPSNAP1, ATP2A1, DZIP1L, AVPR1A, PLA2G4F, SMURF1, ALG11, PLA2G4D, GAS2L3, STEAP4, MYBPC2, NIF3L1, KCNAB2, MYBPC1, GREB1, USH1G, A…	337	11992	19113	1.11141	0.998887	0.678096	7.19579
INTERPRO	IPR003598:Immunoglobulin subtype 2	11	3.22581	0.00449813	ADAMTSL1, MYBPC2, MYOM2, MYBPC1, ALPK2, CD22, LRFN5, TTN, NEGR1, JAM3, MYOT	305	205	16659	2.93081	0.942372	0.510042	6.48718
SP_PIR_KEYWORDS	fatty acid metabolism	6	1.75953	0.00458376	ACSM3, CPT1B, ACSM1, ACSL1, SLC27A2, ACSL5	338	62	19235	5.50725	0.832569	0.112321	6.18275
SP_PIR_KEYWORDS	iron	13	3.81232	0.00463992	CYP2U1, STEAP4, CYP2B6, RSAD2, RPE65, PHYH, BBOX1, CYP4A11, LTF, CYP4F3, NOS2, MB, HPD	338	285	19235	2.59582	0.836203	0.106912	6.25625
GOTERM_BP_FAT	GO:0055080~cation homeostasis	14	4.10557	0.00472077	SLC9A9, KNG1, CCL19, HP, PYGM, CXCL13, SAA1, CCR3, ATP2A1, RYR1, AVPR1A, LTF, CP, MT3	269	286	13528	2.46175	0.999748	0.339186	7.69705
UP_SEQ_FEATURE	metal ion-binding site:Calcium 2; via carbonyl oxygen	5	1.46628	0.0047516	ASGR1, MMP9, ATP2A1, MMP13, MMP12	337	39	19113	7.27117	0.999265	0.643291	7.61754
GOTERM_CC_FAT	GO:0015629~actin cytoskeleton	14	4.10557	0.00475902	ACTA1, TNNC2, SPTBN5, MYBPC2, MYBPC1, USH1G, MYL1, MYLPF, MYOZ1, TTN, MYOT, TNNI2, MYOM2, ABRA	271	269	12782	2.45474	0.734507	0.0846155	6.10621
GOTERM_BP_FAT	GO:0030003~cellular cation homeostasis	13	3.81232	0.0048023	KNG1, CCL19, HP, PYGM, CXCL13, SAA1, CCR3, ATP2A1, RYR1, AVPR1A, LTF, CP, MT3	269	254	13528	2.5739	0.999782	0.330608	7.82494
UP_SEQ_FEATURE	repeat:TPR 10	4	1.17302	0.00491655	IFIT1, TTC37, TTN, TTC6	337	20	19113	11.343	0.999428	0.606773	7.87191
SP_PIR_KEYWORDS	peroxisome	7	2.05279	0.00502041	FAR2, ACSL1, C1QTNF3, SLC27A2, PHYH, ACOT4, PEX7	338	90	19235	4.4262	0.85884	0.108784	6.75283
SP_PIR_KEYWORDS	oxidoreductase	20	5.8651	0.00503821	CYP2U1, STEAP4, SORD, CYP2B6, HSD17B1, HSD17B13, PHYH, BBOX1, AKR1C3, FAR2, CYP4A11, HSD17B6, CYP4F3, SDR16C6, SRD5A2, NOS2, CP, RDH16, WWOX, HPD	338	562	19235	2.02521	0.859819	0.10341	6.776
GOTERM_BP_FAT	GO:0042445~hormone metabolic process	8	2.34604	0.00510209	LEP, UGT1A6, LRAT, CPE, HSD17B1, HSD17B6, SCG5, SRD5A2	269	106	13528	3.79547	0.999871	0.334435	8.2938
GOTERM_BP_FAT	GO:0006811~ion transport	27	7.91789	0.00532984	SLC9A9, STEAP4, KCNAB2, SLC38A6, ATP1B4, PKD1L2, SLCO1A2, SLN, C1QTNF3, TRPV5, LTF, SCNN1D, CPT1B, CACNA2D1, TRPA1, GRIA4, CACNA1S, TCN1, GABRR2, SLCO1B3, BSND, P2RX6, ATP2A1, RYR1, CACNA1H, ABCC4, CP	269	768	13528	1.76801	0.999914	0.334255	8.64848
GOTERM_BP_FAT	GO:0010927~cellular component assembly involved in morphogenesis	5	1.46628	0.00538981	ACTA1, XIRP1, MYOZ1, TTN, CAPN3	269	36	13528	6.98472	0.999922	0.325845	8.74166
GOTERM_BP_FAT	GO:0030005~cellular di-, tri-valent inorganic cation homeostasis	12	3.51906	0.00567725	KNG1, PYGM, SAA1, CXCL13, CCR3, ATP2A1, AVPR1A, RYR1, CCL19, LTF, HP, CP	269	227	13528	2.6585	0.999953	0.328854	9.18705
SP_PIR_KEYWORDS	plasma	7	2.05279	0.00588519	KNG1, VWF, ALB, HP, C2, CP, PROC	338	93	19235	4.28342	0.89935	0.113831	7.87238
GOTERM_CC_FAT	GO:0031674~I band	6	1.75953	0.00595934	ATP2A1, RYR1, ANKRD1, TTN, CACNA1S, MYOT	271	55	12782	5.14539	0.810175	0.0986425	7.59091
GOTERM_CC_FAT	GO:0005626~insoluble fraction	30	8.79765	0.00611197	CYP2U1, SORD, AQP8, CYP2B6, CNP, OAS2, ABCA3, APLP1, UGT1A6, ACSL1, HSD17B6, ENO3, SRD5A2, SELPLG, CD27, ACSL5, CPT1B, MOGAT1, NCEH1, STMN2, S100A12, ABCB4, CYP4A11, P2RX6, LRAT, ATP2A1, RYR1, ABCC4, CYP4F3, RDH16	271	839	12782	1.68651	0.818108	0.0953937	7.77814
SP_PIR_KEYWORDS	sarcoplasmic reticulum	4	1.17302	0.00641177	ANK1, SLN, ATP2A1, CASQ1	338	22	19235	10.347	0.918096	0.117601	8.54797
GOTERM_BP_FAT	GO:0046395~carboxylic acid catabolic process	8	2.34604	0.0065446	LEP, BCAT1, CPT1B, NOS2, ADIPOQ, AFMID, PEX7, HPD	269	111	13528	3.6245	0.99999	0.35738	10.5186
GOTERM_BP_FAT	GO:0016054~organic acid catabolic process	8	2.34604	0.0065446	LEP, BCAT1, CPT1B, NOS2, ADIPOQ, AFMID, PEX7, HPD	269	111	13528	3.6245	0.99999	0.35738	10.5186
INTERPRO	IPR003191:Guanylate-binding protein, C-terminal	3	0.879765	0.00656049	GBP6, GBP5, GBP3	305	7	16659	23.4084	0.984493	0.565385	9.3283
GOTERM_BP_FAT	GO:0048878~chemical homeostasis	20	5.8651	0.00656652	SLC9A9, KNG1, CCL19, HP, ADIPOQ, XIRP1, PYGM, SAA1, CXCL13, CCR3, ATP2A1, RYR1, AVPR1A, LTF, FABP4, CARTPT, CP, LIPC, IFI6, MT3	269	512	13528	1.96445	0.99999	0.347703	10.552
GOTERM_MF_FAT	GO:0008374~O-acyltransferase activity	5	1.46628	0.00678172	AWAT2, CPT1B, MOGAT1, LRAT, CHAT	254	39	12983	6.5531	0.970142	0.504535	9.37374
GOTERM_MF_FAT	GO:0005509~calcium ion binding	30	8.79765	0.00687134	TNNC2, S100A7, MMP9, ITGAE, MYL1, ARSJ, DLK1, TTN, PKD1L2, ASGR1, NPTX2, TRPV5, NOS2, CACNA2D1, PCDHB6, MYLPF, PCDH17, CACNA1S, CAPN3, MMP13, MMP12, S100A12, PROC, CAPN14, ATP2A1, RYR1, CACNA1H, PLA2G4F, CASQ1, PLA2G4D	254	919	12983	1.66858	0.9715	0.447319	9.49195
GOTERM_CC_FAT	GO:0005624~membrane fraction	29	8.5044	0.00687304	CYP2U1, SORD, AQP8, CYP2B6, CNP, OAS2, ABCA3, APLP1, UGT1A6, ACSL1, HSD17B6, ENO3, SRD5A2, SELPLG, CD27, ACSL5, CPT1B, MOGAT1, NCEH1, STMN2, ABCB4, CYP4A11, P2RX6, LRAT, ATP2A1, RYR1, ABCC4, CYP4F3, RDH16	271	809	12782	1.69075	0.852997	0.10104	8.70651
SP_PIR_KEYWORDS	duplication	11	3.22581	0.00715129	KNG1, VWF, TNNC2, ALB, LTF, HP, CD4, C2, CP, CD27, ABCB4	338	228	19235	2.74558	0.938692	0.124487	9.48899
SP_PIR_KEYWORDS	endoplasmic reticulum	23	6.74487	0.00758775	CYP2U1, MOGAT1, NCEH1, CYP2B6, RSAD2, OAS2, AWAT2, FAR2, DGAT2L6, CYP4A11, UGT1A6, ACSL1, PIGM, LRAT, TMEM43, ATP2A1, HSD17B6, CYP4F3, SRD5A2, RDH16, AGR2, SLC27A2, ACSL5	338	713	19235	1.83575	0.948331	0.126002	10.0402
GOTERM_BP_FAT	GO:0050801~ion homeostasis	17	4.98534	0.00762963	SLC9A9, KNG1, CCL19, HP, ADIPOQ, XIRP1, PYGM, SAA1, CXCL13, CCR3, ATP2A1, RYR1, AVPR1A, LTF, CP, IFI6, MT3	269	409	13528	2.09029	0.999999	0.380569	12.1585
GOTERM_BP_FAT	GO:0006873~cellular ion homeostasis	16	4.69208	0.00769501	KNG1, CCL19, HP, ADIPOQ, PYGM, XIRP1, SAA1, CXCL13, CCR3, ATP2A1, RYR1, AVPR1A, LTF, CP, IFI6, MT3	269	374	13528	2.15144	0.999999	0.372754	12.2564
UP_SEQ_FEATURE	repeat:TPR 13	3	0.879765	0.00804413	TTC37, TTN, TTC6	337	8	19113	21.2682	0.999995	0.743229	12.5723
GOTERM_CC_FAT	GO:0030315~T-tubule	4	1.17302	0.00814348	CACNA2D1, RYR1, ESR1, CACNA1S	271	20	12782	9.43321	0.897013	0.11276	10.237
SP_PIR_KEYWORDS	metalloproteinase	4	1.17302	0.00821246	KEL, MMP9, MMP13, MMP12	338	24	19235	9.48471	0.959556	0.130182	10.8236
GOTERM_BP_FAT	GO:0055066~di-, tri-valent inorganic cation homeostasis	12	3.51906	0.0082507	KNG1, PYGM, SAA1, CXCL13, CCR3, ATP2A1, AVPR1A, RYR1, CCL19, LTF, HP, CP	269	239	13528	2.52502	0.999999	0.383418	13.0844
INTERPRO	IPR007130:Diacylglycerol acyltransferase	3	0.879765	0.00864238	AWAT2, DGAT2L6, MOGAT1	305	8	16659	20.4824	0.99589	0.599777	12.1145
PIR_SUPERFAMILY	PIRSF005552:guanine nucleotide-binding protein 1	3	0.879765	0.00898434	GBP6, GBP5, GBP3	160	7	7396	19.8107	0.821607	0.821607	10.6193
UP_SEQ_FEATURE	propeptide:Activation peptide	6	1.75953	0.00923447	CPE, MMP9, PRSS27, MMP13, MMP12, CTSL1	337	73	19113	4.66152	0.999999	0.754761	14.3013
GOTERM_BP_FAT	GO:0060538~skeletal muscle organ development	6	1.75953	0.00983189	ACTA1, SIX1, RXRG, MYLPF, CACNA1S, CHAT	269	66	13528	4.57181	1	0.4277	15.4004
GOTERM_BP_FAT	GO:0007519~skeletal muscle tissue development	6	1.75953	0.00983189	ACTA1, SIX1, RXRG, MYLPF, CACNA1S, CHAT	269	66	13528	4.57181	1	0.4277	15.4004
UP_SEQ_FEATURE	repeat:TPR 8	5	1.46628	0.00993887	IFIT3, IFIT1, TTC37, TTN, TTC6	337	48	19113	5.90783	1	0.747338	15.3092
GOTERM_BP_FAT	GO:0042493~response to drug	11	3.22581	0.0110962	UGT1A6, ACSL1, TRPA1, ENO3, FABP4, SRD5A2, CAPN3, ABCA3, ADIPOQ, MMP12, ABCB4	269	216	13528	2.56106	1	0.456954	17.2102
GOTERM_BP_FAT	GO:0019725~cellular homeostasis	18	5.27859	0.0116402	KNG1, CCL19, HP, ADIPOQ, XIRP1, PYGM, SAA1, CXCL13, CCR3, ATP2A1, NPM1, RYR1, AVPR1A, CARTPT, LTF, CP, IFI6, MT3	269	466	13528	1.94253	1	0.462733	17.9778
GOTERM_BP_FAT	GO:0003013~circulatory system process	10	2.93255	0.0119688	ACSM3, KNG1, UTS2, KEL, MYL1, AVPR1A, CARTPT, NOS2, ADIPOQ, CXCL10	269	186	13528	2.70376	1	0.462115	18.4381
GOTERM_BP_FAT	GO:0008015~blood circulation	10	2.93255	0.0119688	ACSM3, KNG1, UTS2, KEL, MYL1, AVPR1A, CARTPT, NOS2, ADIPOQ, CXCL10	269	186	13528	2.70376	1	0.462115	18.4381
GOTERM_BP_FAT	GO:0009991~response to extracellular stimulus	11	3.22581	0.0124992	LEP, ASGR1, UGT1A6, ACSL1, ACTA1, STC2, ALB, AVPR1A, CARTPT, CP, ADIPOQ	269	220	13528	2.5145	1	0.467014	19.1761
UP_SEQ_FEATURE	metal ion-binding site:Zinc 2; in inhibited form	3	0.879765	0.0126314	MMP9, MMP13, MMP12	337	10	19113	17.0145	1	0.799084	19.0603
UP_SEQ_FEATURE	repeat:TPR 12	3	0.879765	0.0126314	TTC37, TTN, TTC6	337	10	19113	17.0145	1	0.799084	19.0603
GOTERM_BP_FAT	GO:0006954~inflammatory response	14	4.10557	0.012836	KNG1, IL1RN, CXCL9, LYZ, CCL19, S100A12, EPHA3, CXCL10, CHST1, CXCL13, SAA1, CCR3, C2, PTAFR	269	325	13528	2.16634	1	0.466538	19.6414
GOTERM_MF_FAT	GO:0005529~sugar binding	10	2.93255	0.01424	ASGR1, ZG16B, SORD, PYGM, NPTX2, LGALS9C, FBP1, CD22, SELPLG, PKD1L2	254	195	12983	2.62124	0.999389	0.652585	18.7346
GOTERM_BP_FAT	GO:0048545~response to steroid hormone stimulus	10	2.93255	0.0144875	UGT1A6, ACTA1, IL1RN, AVPR1A, ESR1, FABP4, SRD5A2, MMP13, ADIPOQ, ABCB4	269	192	13528	2.61927	1	0.498739	21.887
GOTERM_BP_FAT	GO:0009725~response to hormone stimulus	15	4.39883	0.0147616	ACTA1, IL1RN, FBP1, ESR1, RPE65, ADIPOQ, MMP13, ACVR1C, ABCB4, LEP, UGT1A6, AVPR1A, FABP4, SRD5A2, MB	269	367	13528	2.05545	1	0.496046	22.2539
SP_PIR_KEYWORDS	hydrolase	40	11.7302	0.014847	PHLPP1, ADAMTSL1, KEL, MMP9, ADAMTS16, ARSJ, CNP, RPE65, ACOT4, ASAH1, CTSL1, AFMID, DDHD1, ACSL1, LTF, EXOG, C2, HYAL2, NCEH1, PM20D1, PTPRR, LYZ, FBP1, CHI3L2, MMP13, CAPN3, MMP12, ABCB4, PROC, MTMR14, LYG2, GLA, CPE, ATP2A1, CAPN14, PRSS27, PLA2G4F, GLB1L2, LIPC, PLA2G4D	338	1555	19235	1.46388	0.997029	0.215297	18.7625
GOTERM_MF_FAT	GO:0042379~chemokine receptor binding	5	1.46628	0.0150245	YARS, CXCL13, CXCL9, CCL19, CXCL10	254	49	12983	5.21573	0.999595	0.623348	19.6651
GOTERM_MF_FAT	GO:0004467~long-chain-fatty-acid-CoA ligase activity	3	0.879765	0.0153529	ACSL1, SLC27A2, ACSL5	254	10	12983	15.3343	0.999659	0.588135	20.0517
UP_SEQ_FEATURE	repeat:TPR 9	4	1.17302	0.0153895	IFIT1, TTC37, TTN, TTC6	337	30	19113	7.56202	1	0.835922	22.7405
INTERPRO	IPR002347:Glucose/ribitol dehydrogenase	5	1.46628	0.0157978	HSD17B1, HSD17B13, HSD17B6, RDH16, WWOX	305	53	16659	5.1528	0.999958	0.763067	21.0935
INTERPRO	IPR015894:Guanylate-binding protein, N-terminal	3	0.879765	0.0163742	GBP6, GBP5, GBP3	305	11	16659	14.8963	0.999971	0.72919	21.7783
GOTERM_BP_FAT	GO:0006875~cellular metal ion homeostasis	10	2.93255	0.0164261	KNG1, PYGM, SAA1, CXCL13, CCR3, ATP2A1, AVPR1A, RYR1, CCL19, MT3	269	196	13528	2.56581	1	0.524606	24.4473
UP_SEQ_FEATURE	binding site:Substrate	12	3.51906	0.0164279	AKR1C3, HSD17B1, HSD17B13, PUS10, FBP1, ARSJ, HSD17B6, ENO3, CNP, SDR16C6, RDH16, WWOX	337	297	19113	2.29152	1	0.833456	24.0848
GOTERM_BP_FAT	GO:0010033~response to organic substance	24	7.03812	0.0165152	ACTA1, RBM3, IL1RN, FBP1, ESR1, RPE65, MMP13, ADIPOQ, ASAH1, ACVR1C, EPHA3, ABCB4, LEP, UGT1A6, ACSL1, PYGM, AVPR1A, RYR1, FABP4, CD4, SRD5A2, PTAFR, CD27, MB	269	721	13528	1.67401	1	0.517604	24.5632
GOTERM_MF_FAT	GO:0005245~voltage-gated calcium channel activity	4	1.17302	0.0167237	CACNA2D1, RYR1, CACNA1H, CACNA1S	254	28	12983	7.30202	0.999834	0.581148	21.6465
SP_PIR_KEYWORDS	calcium transport	6	1.75953	0.0168092	CACNA2D1, ATP2A1, RYR1, TRPV5, CACNA1H, CACNA1S	338	85	19235	4.01706	0.998632	0.231853	20.9816
KEGG_PATHWAY	hsa04920:Adipocytokine signaling pathway	6	1.75953	0.0171914	LEP, CPT1B, ACSL1, RXRG, ADIPOQ, ACSL5	116	67	5085	3.92563	0.856609	0.476592	17.8459
GOTERM_BP_FAT	GO:0001666~response to hypoxia	8	2.34604	0.0173004	PYGM, IL18, RYR1, NOS2, MMP13, ADIPOQ, MB, MT3	269	134	13528	3.00239	1	0.525417	25.5761
GOTERM_BP_FAT	GO:0000272~polysaccharide catabolic process	4	1.17302	0.0174745	HYAL2, LYG2, PYGM, CHI3L2	269	28	13528	7.18428	1	0.520476	25.799
KEGG_PATHWAY	hsa04020:Calcium signaling pathway	10	2.93255	0.0175246	PHKA2, P2RX6, TNNC2, ATP2A1, AVPR1A, RYR1, CACNA1H, NOS2, CACNA1S, PTAFR	116	176	5085	2.49069	0.861952	0.390453	18.161
SP_PIR_KEYWORDS	muscle contraction	3	0.879765	0.0179869	ACTA1, TNNC2, TNNI2	338	12	19235	14.2271	0.999142	0.237812	22.2863
SP_PIR_KEYWORDS	Acyltransferase	8	2.34604	0.0184	AWAT2, ZDHHC23, CPT1B, DGAT2L6, GLYAT, MOGAT1, LRAT, CHAT	338	153	19235	2.9756	0.999271	0.23476	22.7392
GOTERM_CC_FAT	GO:0034704~calcium channel complex	4	1.17302	0.0187508	CACNA2D1, ATP2A1, CACNA1H, CACNA1S	271	27	12782	6.98756	0.994816	0.231343	22.1205
GOTERM_MF_FAT	GO:0005262~calcium channel activity	6	1.75953	0.0189286	CACNA2D1, TRPA1, RYR1, TRPV5, CACNA1H, CACNA1S	254	79	12983	3.88209	0.999948	0.591979	24.1499
GOTERM_BP_FAT	GO:0006955~immune response	23	6.74487	0.018992	CRISP3, GBP6, GBP5, S100A7, IL18, IL1RN, CXCL9, MYLPF, RSAD2, CCL19, NLRX1, OAS2, CXCL10, CXCL13, SEMA7A, LTF, CD4, C2, NOS2, GBP3, IFI6, PTAFR, CD27	269	690	13528	1.67633	1	0.541966	27.7151
BBID	109.Chemokine_families	4	1.17302	0.0191642	CXCL13, CXCL9, CCL19, CXCL10	10	25	358	5.728	0.383536	0.383536	14.529
GOTERM_BP_FAT	GO:0051384~response to glucocorticoid stimulus	6	1.75953	0.0192074	UGT1A6, IL1RN, AVPR1A, FABP4, ADIPOQ, ABCB4	269	78	13528	3.86846	1	0.537821	27.9832
UP_SEQ_FEATURE	repeat:TPR 7	5	1.46628	0.0200195	IFIT3, IFIT1, TTC37, TTN, TTC6	337	59	19113	4.80637	1	0.870294	28.567
SP_PIR_KEYWORDS	polymorphism	222	65.1026	0.0202366	SLC9A9, LYPD2, UTS2, S100A7, AQP8, ATP1B4, SEMA7A, WWOX, TMEM14A, LYRM2, CRISP3, YARS, GBP6, GBP5, PTPRR, CCDC136, IFI44, DEPDC1, SPAG6, CCR3, RYR1, RTP4, AMTN, CYP2B6, KEL, SORCS1, KBTBD5, MAML3, GUCY2F, ST6GAL2, IL1RN, CHI3L2, IFI27L1, EPHA3, TNKS1BP1, ZFHX4, NIPSNAP1, DZIP1L, AVPR1A, PLA2G4F, SMURF1, ALG11, PLA2G4D, GAS2L3, STEAP4, MYBPC2, NIF3L1, KCNAB2, MYBPC1, GREB1, ARSJ, SPINK4, ASAH1, FA…	338	11550	19235	1.09382	0.999648	0.247254	24.7232
UP_SEQ_FEATURE	repeat:TPR 11	3	0.879765	0.0211477	TTC37, TTN, TTC6	337	13	19113	13.0881	1	0.867861	29.9228
GOTERM_BP_FAT	GO:0016052~carbohydrate catabolic process	7	2.05279	0.0212553	HYAL2, SORD, LYG2, FUT8, PYGM, CHI3L2, ENO3	269	109	13528	3.22963	1	0.566552	30.4866
GOTERM_BP_FAT	GO:0055065~metal ion homeostasis	10	2.93255	0.0213253	KNG1, PYGM, SAA1, CXCL13, CCR3, ATP2A1, AVPR1A, RYR1, CCL19, MT3	269	205	13528	2.45317	1	0.559802	30.5706
SP_PIR_KEYWORDS	cleavage on pair of basic residues	11	3.22581	0.0216527	VWF, UTS2, CPE, ALB, ADAMTS16, ITGAE, CARTPT, SCG5, SELPLG, ITM2C, PROC	338	271	19235	2.30993	0.9998	0.254451	26.2206
GOTERM_MF_FAT	GO:0016229~steroid dehydrogenase activity	4	1.17302	0.0219905	AKR1C3, HSD17B1, HSD17B6, SRD5A2	254	31	12983	6.59538	0.99999	0.615628	27.503
SP_PIR_KEYWORDS	calcium channel	5	1.46628	0.0220995	CACNA2D1, RYR1, TRPV5, CACNA1H, CACNA1S	338	61	19235	4.66461	0.999832	0.251565	26.6874
GOTERM_BP_FAT	GO:0070482~response to oxygen levels	8	2.34604	0.0222032	PYGM, IL18, RYR1, NOS2, MMP13, ADIPOQ, MB, MT3	269	141	13528	2.85333	1	0.566779	31.6173
INTERPRO	IPR002198:Short-chain dehydrogenase/reductase SDR	5	1.46628	0.0225683	HSD17B1, HSD17B13, HSD17B6, RDH16, WWOX	305	59	16659	4.62879	0.999999	0.799209	28.7949
GOTERM_BP_FAT	GO:0045214~sarcomere organization	3	0.879765	0.0226391	XIRP1, TTN, CAPN3	269	12	13528	12.5725	1	0.566277	32.1316
GOTERM_BP_FAT	GO:0003009~skeletal muscle contraction	3	0.879765	0.0226391	TNNC2, TNNI2, MB	269	12	13528	12.5725	1	0.566277	32.1316
INTERPRO	IPR001089:Small chemokine, C-X-C	3	0.879765	0.0226716	CXCL13, CXCL9, CXCL10	305	13	16659	12.6045	1	0.765812	28.9067
GOTERM_BP_FAT	GO:0006816~calcium ion transport	8	2.34604	0.0229745	CACNA2D1, SLN, ATP2A1, TRPA1, RYR1, TRPV5, CACNA1H, CACNA1S	269	142	13528	2.83324	1	0.564197	32.5247
GOTERM_BP_FAT	GO:0030001~metal ion transport	17	4.98534	0.023028	SLC9A9, STEAP4, CACNA2D1, KCNAB2, TRPA1, SLC38A6, ATP1B4, TCN1, CACNA1S, SLN, ATP2A1, TRPV5, RYR1, CACNA1H, LTF, CP, SCNN1D	269	465	13528	1.83856	1	0.557746	32.5872
BIOCARTA	h_no2il12Pathway:NO2-dependent IL 12 Pathway in NK cells	3	0.879765	0.0233498	TYK2, CD4, NOS2	28	13	1437	11.8434	0.799435	0.799435	21.578
UP_SEQ_FEATURE	active site:Proton acceptor	20	5.8651	0.0241103	CPT1B, SGK2, HSD17B1, HSD17B13, PM20D1, TTK, CNP, TTN, ACVR1C, EPHA3, TYK2, PAK7, EXOG, HSD17B6, ENO3, NRK, SDR16C6, RDH16, CHAT, WWOX	337	658	19113	1.72386	1	0.88639	33.3689
SP_PIR_KEYWORDS	limb-girdle muscular dystrophy	3	0.879765	0.0242362	TTN, CAPN3, MYOT	338	14	19235	12.1946	0.999928	0.26499	28.8815
GOTERM_MF_FAT	GO:0022838~substrate specific channel activity	15	4.39883	0.024306	CACNA2D1, KCNAB2, AQP8, TRPA1, GRIA4, CACNA1S, PKD1L2, GABRR2, BSND, P2RX6, TRPV5, RYR1, CACNA1H, ABCC4, SCNN1D	254	398	12983	1.92641	0.999997	0.62344	29.9464
UP_SEQ_FEATURE	metal ion-binding site:Zinc 2; catalytic	3	0.879765	0.0243895	MMP9, MMP13, MMP12	337	14	19113	12.1532	1	0.874848	33.6852
UP_SEQ_FEATURE	domain:GPS	4	1.17302	0.0250619	GPR97, GPR110, BAI1, PKD1L2	337	36	19113	6.30168	1	0.867851	34.4415
GOTERM_BP_FAT	GO:0042592~homeostatic process	24	7.03812	0.0252695	KNG1, SLC9A9, CCL19, HP, ADIPOQ, EPHA3, TNKS1BP1, XIRP1, PYGM, SAA1, CXCL13, CCR3, ATP2A1, NPM1, RYR1, AVPR1A, LTF, FABP4, CARTPT, CP, LIPC, IFI6, MT3, MB	269	751	13528	1.60714	1	0.584692	35.1578
GOTERM_BP_FAT	GO:0010565~regulation of cellular ketone metabolic process	5	1.46628	0.0262084	LEP, CPT1B, ACSL1, AVPR1A, ADIPOQ	269	57	13528	4.4114	1	0.591102	36.207
GOTERM_BP_FAT	GO:0031960~response to corticosteroid stimulus	6	1.75953	0.0267293	UGT1A6, IL1RN, AVPR1A, FABP4, ADIPOQ, ABCB4	269	85	13528	3.54988	1	0.591431	36.7821
INTERPRO	IPR000169:Peptidase, cysteine peptidase active site	4	1.17302	0.0275683	CAPN14, TTN, CAPN3, CTSL1	305	36	16659	6.06885	1	0.799854	34.0257
GOTERM_BP_FAT	GO:0008610~lipid biosynthetic process	13	3.81232	0.0276254	CPT1B, MOGAT1, HSD17B1, PEX7, AWAT2, ACSM3, DGAT2L6, FAR2, PIGM, C1QTNF3, HSD17B6, SRD5A2, LIPC	269	323	13528	2.02405	1	0.596825	37.76
COG_ONTOLOGY	Lipid metabolism	5	1.46628	0.0282718	ACSM3, ACSM1, ACSL1, AFMID, ACSL5	37	64	1950	4.1174	0.33069	0.33069	17.7013
SP_PIR_KEYWORDS	transmembrane	104	30.4985	0.028353	SLC9A9, TMEM19, AQP8, TUSC5, ATP1B4, KIAA1324, DLK1, DGAT2L6, TMEM14A, MS4A7, PTPRR, MRGPRD, CCDC136, TMEM207, GABRR2, LRAT, LPAR5, CCR3, RYR1, NRSN2, TMPRSS11BNL, GBP3, TMEM213, RTP4, KEL, ITGAE, SLC38A6, SORCS1, ABCA3, BAI1, LRFN5, GUCY2F, CACNA2D1, ST6GAL2, PCDH17, CACNA1S, IFI27L1, ABCB4, EPHA3, AWAT2, P2RX6, ATP2A1, AVPR1A, CACNA1H, SYT13, ALG11, IFI6, STEAP4, GREB1, SLC16A12, LGR4, ACVR1C, …	338	4973	19235	1.19012	0.999986	0.295063	32.9382
SMART	SM00303:GPS	4	1.17302	0.0284214	GPR97, GPR110, BAI1, PKD1L2	160	38	9079	5.97303	0.980185	0.859233	28.7141
GOTERM_MF_FAT	GO:0009055~electron carrier activity	10	2.93255	0.0291959	CYP2U1, CYP4A11, STEAP4, CYP2B6, HSD17B6, CYP4F3, NOS2, RDH16, PHYH, BBOX1	254	221	12983	2.31286	1	0.664488	34.8568
GOTERM_BP_FAT	GO:0034754~cellular hormone metabolic process	5	1.46628	0.0292944	UGT1A6, LRAT, HSD17B1, HSD17B6, SRD5A2	269	59	13528	4.26186	1	0.611926	39.5438
GOTERM_BP_FAT	GO:0055114~oxidation reduction	21	6.15836	0.0293397	CYP2U1, STEAP4, SORD, KCNAB2, CYP2B6, HSD17B1, HSD17B13, PHYH, DHRS7C, BBOX1, AKR1C3, FAR2, CYP4A11, HSD17B6, CYP4F3, SRD5A2, NOS2, CP, RDH16, WWOX, HPD	269	639	13528	1.65272	1	0.605886	39.5915
UP_SEQ_FEATURE	metal ion-binding site:Iron (heme axial ligand)	6	1.75953	0.0293944	CYP2U1, CYP4A11, STEAP4, CYP2B6, CYP4F3, NOS2	337	98	19113	3.47236	1	0.89565	39.1231
UP_SEQ_FEATURE	transmembrane region	103	30.2053	0.0295902	SLC9A9, TMEM19, AQP8, TUSC5, ATP1B4, KIAA1324, DLK1, DGAT2L6, TMEM14A, MS4A7, PTPRR, MRGPRD, CCDC136, TMEM207, GABRR2, LRAT, LPAR5, CCR3, RYR1, NRSN2, GBP3, TMEM213, RTP4, KEL, ITGAE, SLC38A6, SORCS1, ABCA3, BAI1, LRFN5, GUCY2F, CACNA2D1, ST6GAL2, PCDH17, CACNA1S, IFI27L1, ABCB4, EPHA3, AWAT2, P2RX6, ATP2A1, AVPR1A, CACNA1H, SYT13, ALG11, IFI6, STEAP4, GREB1, SLC16A12, LGR4, ACVR1C, ASGR1, FAR2, …	337	4911	19113	1.1895	1	0.885473	39.3271
GOTERM_BP_FAT	GO:0006874~cellular calcium ion homeostasis	9	2.6393	0.0296726	KNG1, PYGM, SAA1, CXCL13, CCR3, ATP2A1, AVPR1A, RYR1, CCL19	269	183	13528	2.47328	1	0.603594	39.9412
COG_ONTOLOGY	Secondary metabolites biosynthesis, transport, and catabolism	5	1.46628	0.0297343	CYP2U1, CYP4A11, CYP2B6, RPE65, CYP4F3	37	65	1950	4.05405	0.344656	0.190467	18.539
SMART	SM00409:IG	12	3.51906	0.0301853	ADAMTSL1, MYBPC2, MYOM2, MYBPC1, ALPK2, SEMA7A, CD22, CD4, TTN, NEGR1, JAM3, MYOT	160	330	9079	2.06341	0.984524	0.750795	30.2187
SP_PIR_KEYWORDS	actin-binding	10	2.93255	0.0303081	MYBPC2, NRAP, XIRP1, SPTBN5, MYBPC1, XIRP2, ABRA, LMOD2, MYOT, TNNI2	338	247	19235	2.30398	0.999994	0.30427	34.7885
GOTERM_BP_FAT	GO:0010817~regulation of hormone levels	8	2.34604	0.0307631	LEP, UGT1A6, LRAT, CPE, HSD17B1, HSD17B6, SCG5, SRD5A2	269	151	13528	2.66437	1	0.610664	41.0736
GOTERM_BP_FAT	GO:0009719~response to endogenous stimulus	15	4.39883	0.0311512	ACTA1, IL1RN, FBP1, ESR1, RPE65, ADIPOQ, MMP13, ACVR1C, ABCB4, LEP, UGT1A6, AVPR1A, FABP4, SRD5A2, MB	269	405	13528	1.86259	1	0.609063	41.4716
GOTERM_MF_FAT	GO:0015267~channel activity	15	4.39883	0.0313909	CACNA2D1, KCNAB2, AQP8, TRPA1, GRIA4, CACNA1S, PKD1L2, GABRR2, BSND, P2RX6, TRPV5, RYR1, CACNA1H, ABCC4, SCNN1D	254	412	12983	1.86095	1	0.666182	36.9551
GOTERM_BP_FAT	GO:0048747~muscle fiber development	4	1.17302	0.0315656	ACTA1, TTN, CACNA1S, CHAT	269	35	13528	5.74742	1	0.607823	41.894
INTERPRO	IPR000203:GPS	4	1.17302	0.0317221	GPR97, GPR110, BAI1, PKD1L2	305	38	16659	5.74944	1	0.817399	38.0963
UP_SEQ_FEATURE	repeat:TPR 6	5	1.46628	0.0317246	IFIT3, IFIT1, TTC37, TTN, TTC6	337	68	19113	4.17023	1	0.891399	41.5093
GOTERM_MF_FAT	GO:0022803~passive transmembrane transporter activity	15	4.39883	0.0319797	CACNA2D1, KCNAB2, AQP8, TRPA1, GRIA4, CACNA1S, PKD1L2, GABRR2, BSND, P2RX6, TRPV5, RYR1, CACNA1H, ABCC4, SCNN1D	254	413	12983	1.85645	1	0.64943	37.5071
SP_PIR_KEYWORDS	membrane	127	37.2434	0.0321665	SLC9A9, LYPD2, TMEM19, AQP8, TUSC5, ATP1B4, KIAA1324, CNP, RPE65, DLK1, DGAT2L6, ANK1, SEMA7A, NEGR1, TMEM14A, MS4A7, GBP5, STMN2, MRGPRD, PTPRR, CCDC136, TMEM207, GABRR2, LRAT, LPAR5, CCR3, RYR1, NRSN2, GBP3, PHKA2, RTP4, TMEM213, CYP2B6, KEL, ITGAE, SLC38A6, SORCS1, ABCA3, BAI1, LRFN5, GUCY2F, CACNA2D1, ST6GAL2, PCDH17, IFI27L1, CACNA1S, ABCB4, EPHA3, AWAT2, P2RX6, ATP2A1, AVPR1A, PLA2G4F, CACN…	338	6256	19235	1.15527	0.999997	0.312072	36.5034
GOTERM_MF_FAT	GO:0004175~endopeptidase activity	14	4.10557	0.0324628	ADAMTS16, MMP9, KEL, HP, CAPN3, MMP13, CTSL1, MMP12, PROC, CAPN14, PRSS27, LTF, C2, PRSS35	254	375	12983	1.90826	1	0.632742	37.9567
UP_SEQ_FEATURE	domain:Kazal-like	4	1.17302	0.0329552	SPINK9, SLCO1B3, SLCO1A2, SPINK4	337	40	19113	5.67151	1	0.890005	42.7337
GOTERM_BP_FAT	GO:0009062~fatty acid catabolic process	4	1.17302	0.0339452	LEP, CPT1B, ADIPOQ, PEX7	269	36	13528	5.58777	1	0.628912	44.2639
GOTERM_BP_FAT	GO:0055074~calcium ion homeostasis	9	2.6393	0.0340505	KNG1, PYGM, SAA1, CXCL13, CCR3, ATP2A1, AVPR1A, RYR1, CCL19	269	188	13528	2.4075	1	0.62409	44.3667
SMART	SM00199:SCY	4	1.17302	0.0345837	CXCL13, CXCL9, CCL19, CXCL10	160	41	9079	5.53598	0.99166	0.697798	33.8447
GOTERM_BP_FAT	GO:0009611~response to wounding	18	5.27859	0.0345871	KNG1, IL1RN, LYZ, CXCL9, CCL19, PROC, S100A12, EPHA3, CXCL10, CHST1, VWF, SAA1, CXCL13, CCR3, ENO3, C2, PAPSS2, PTAFR	269	530	13528	1.70796	1	0.624058	44.8875
UP_SEQ_FEATURE	repeat:Xin 8	2	0.58651	0.0348512	XIRP1, XIRP2	337	2	19113	56.7151	1	0.89346	44.5731
UP_SEQ_FEATURE	repeat:Xin 14	2	0.58651	0.0348512	XIRP1, XIRP2	337	2	19113	56.7151	1	0.89346	44.5731
UP_SEQ_FEATURE	repeat:Xin 11	2	0.58651	0.0348512	XIRP1, XIRP2	337	2	19113	56.7151	1	0.89346	44.5731
UP_SEQ_FEATURE	repeat:Xin 9	2	0.58651	0.0348512	XIRP1, XIRP2	337	2	19113	56.7151	1	0.89346	44.5731
UP_SEQ_FEATURE	repeat:Xin 12	2	0.58651	0.0348512	XIRP1, XIRP2	337	2	19113	56.7151	1	0.89346	44.5731
UP_SEQ_FEATURE	repeat:Xin 15	2	0.58651	0.0348512	XIRP1, XIRP2	337	2	19113	56.7151	1	0.89346	44.5731
UP_SEQ_FEATURE	repeat:Xin 3	2	0.58651	0.0348512	XIRP1, XIRP2	337	2	19113	56.7151	1	0.89346	44.5731
UP_SEQ_FEATURE	repeat:Xin 6	2	0.58651	0.0348512	XIRP1, XIRP2	337	2	19113	56.7151	1	0.89346	44.5731
UP_SEQ_FEATURE	repeat:Xin 2	2	0.58651	0.0348512	XIRP1, XIRP2	337	2	19113	56.7151	1	0.89346	44.5731
UP_SEQ_FEATURE	repeat:Xin 16	2	0.58651	0.0348512	XIRP1, XIRP2	337	2	19113	56.7151	1	0.89346	44.5731
UP_SEQ_FEATURE	repeat:Xin 10	2	0.58651	0.0348512	XIRP1, XIRP2	337	2	19113	56.7151	1	0.89346	44.5731
UP_SEQ_FEATURE	repeat:Xin 1	2	0.58651	0.0348512	XIRP1, XIRP2	337	2	19113	56.7151	1	0.89346	44.5731
UP_SEQ_FEATURE	repeat:Xin 5	2	0.58651	0.0348512	XIRP1, XIRP2	337	2	19113	56.7151	1	0.89346	44.5731
UP_SEQ_FEATURE	repeat:Xin 7	2	0.58651	0.0348512	XIRP1, XIRP2	337	2	19113	56.7151	1	0.89346	44.5731
UP_SEQ_FEATURE	repeat:Xin 13	2	0.58651	0.0348512	XIRP1, XIRP2	337	2	19113	56.7151	1	0.89346	44.5731
UP_SEQ_FEATURE	repeat:Xin 4	2	0.58651	0.0348512	XIRP1, XIRP2	337	2	19113	56.7151	1	0.89346	44.5731
UP_SEQ_FEATURE	repeat:Xin 17	2	0.58651	0.0348512	XIRP1, XIRP2	337	2	19113	56.7151	1	0.89346	44.5731
UP_SEQ_FEATURE	zinc finger region:DPH-type	2	0.58651	0.0348512	DNAJC24, DPH3	337	2	19113	56.7151	1	0.89346	44.5731
SP_PIR_KEYWORDS	calcium binding	6	1.75953	0.0349111	TNNC2, S100A7, CAPN3, CASQ1, PROC, S100A12	338	103	19235	3.31505	0.999999	0.326284	38.9596
SP_PIR_KEYWORDS	glycogen storage disease	3	0.879765	0.0349971	PHKA2, PYGM, ENO3	338	17	19235	10.0426	0.999999	0.319508	39.0351
PIR_SUPERFAMILY	PIRSF002522:CXC chemokine	3	0.879765	0.0352831	CXCL13, CXCL9, CXCL10	160	14	7396	9.90536	0.998952	0.967626	36.0348
INTERPRO	IPR012510:Actin-binding, Xin repeat	2	0.58651	0.0361649	XIRP1, XIRP2	305	2	16659	54.6197	1	0.833637	42.1901
INTERPRO	IPR007872:Zinc finger, DPH-type	2	0.58651	0.0361649	DNAJC24, DPH3	305	2	16659	54.6197	1	0.833637	42.1901
INTERPRO	IPR015577:Interferon-induced Mx protein	2	0.58651	0.0361649	MX1, MX2	305	2	16659	54.6197	1	0.833637	42.1901
KEGG_PATHWAY	hsa00590:Arachidonic acid metabolism	5	1.46628	0.0370338	AKR1C3, CYP2U1, CYP4A11, CYP2B6, CYP4F3	116	56	5085	3.91395	0.985397	0.570575	34.8044
INTERPRO	IPR018048:Small chemokine, C-X-C, conserved site	3	0.879765	0.0376879	CXCL13, CXCL9, CXCL10	305	17	16659	9.63877	1	0.823947	43.5344
GOTERM_BP_FAT	GO:0019318~hexose metabolic process	9	2.6393	0.0378376	PHKA2, LEP, SORD, FUT8, PYGM, FBP1, ENO3, ADIPOQ, CHST1	269	192	13528	2.35734	1	0.651915	47.9455
UP_SEQ_FEATURE	nucleotide phosphate-binding region:NADP	5	1.46628	0.0379797	AKR1C3, KCNAB2, HSD17B1, NOS2, WWOX	337	72	19113	3.93855	1	0.904289	47.4874
INTERPRO	IPR001811:Small chemokine, interleukin-8-like	4	1.17302	0.0385297	CXCL13, CXCL9, CCL19, CXCL10	305	41	16659	5.32875	1	0.8095	44.2648
SP_PIR_KEYWORDS	thick filament	3	0.879765	0.0389246	MYBPC2, MYOM2, MYBPC1	338	18	19235	9.48471	1	0.34125	42.3929
GOTERM_BP_FAT	GO:0014902~myotube differentiation	3	0.879765	0.0390845	AVPR1A, CACNA1H, CACNA1S	269	16	13528	9.42937	1	0.658362	49.0756
GOTERM_MF_FAT	GO:0005506~iron ion binding	12	3.51906	0.0392056	CYP2U1, CYP4A11, STEAP4, CYP2B6, LTF, RSAD2, CYP4F3, NOS2, PHYH, BBOX1, MB, HPD	254	308	12983	1.99146	1	0.682259	43.9257
GOTERM_BP_FAT	GO:0017183~peptidyl-diphthamide biosynthetic process from peptidyl-histidine	2	0.58651	0.0392305	DPH5, DPH3	269	2	13528	50.29	1	0.654154	49.2064
GOTERM_BP_FAT	GO:0051659~maintenance of mitochondrion location	2	0.58651	0.0392305	ALB, ATP2A1	269	2	13528	50.29	1	0.654154	49.2064
GOTERM_BP_FAT	GO:0017182~peptidyl-diphthamide metabolic process	2	0.58651	0.0392305	DPH5, DPH3	269	2	13528	50.29	1	0.654154	49.2064
GOTERM_MF_FAT	GO:0005216~ion channel activity	14	4.10557	0.0394592	CACNA2D1, KCNAB2, TRPA1, GRIA4, CACNA1S, PKD1L2, GABRR2, BSND, P2RX6, TRPV5, RYR1, CACNA1H, ABCC4, SCNN1D	254	386	12983	1.85388	1	0.664906	44.1394
UP_SEQ_FEATURE	short sequence motif:Cysteine switch	4	1.17302	0.0396244	MMP9, ADAMTS16, MMP13, MMP12	337	43	19113	5.27583	1	0.905189	48.9611
INTERPRO	IPR003599:Immunoglobulin subtype	12	3.51906	0.0403943	ADAMTSL1, MYBPC2, MYOM2, MYBPC1, ALPK2, SEMA7A, CD22, CD4, TTN, NEGR1, JAM3, MYOT	305	330	16659	1.98617	1	0.80432	45.8515
GOTERM_MF_FAT	GO:0046906~tetrapyrrole binding	7	2.05279	0.0404742	CYP2U1, CYP4A11, CYP2B6, CYP4F3, NOS2, TCN1, MB	254	129	12983	2.77364	1	0.655601	44.9871
GOTERM_BP_FAT	GO:0046883~regulation of hormone secretion	5	1.46628	0.0417299	LEP, SCG5, NOS2, ADIPOQ, ACVR1C	269	66	13528	3.80985	1	0.671754	51.3973
INTERPRO	IPR001818:Peptidase M10A and M12B, matrixin and adamalysin	4	1.17302	0.0434471	MMP9, ADAMTS16, MMP13, MMP12	305	43	16659	5.0809	1	0.808709	48.3584
OMIM_DISEASE	Refsum disease	2	0.58651	0.0436487	PHYH, PEX7	82	2	3671	44.7683	0.998868	0.998868	41.3848
GOTERM_CC_FAT	GO:0031672~A band	3	0.879765	0.0439041	ANK1, ATP2A1, TTN	271	16	12782	8.84363	0.999996	0.44808	44.7327
UP_SEQ_FEATURE	repeat:TPR 5	5	1.46628	0.044892	IFIT3, IFIT1, TTC37, TTN, TTC6	337	76	19113	3.73126	1	0.924016	53.4236
GOTERM_MF_FAT	GO:0005507~copper ion binding	5	1.46628	0.0454935	STEAP4, ALB, CP, APLP1, MT3	254	69	12983	3.70393	1	0.681478	49.0061
GOTERM_MF_FAT	GO:0030246~carbohydrate binding	13	3.81232	0.0458241	KNG1, SORD, LGALS9C, FBP1, PKD1L2, APLP1, ZG16B, ASGR1, PYGM, NPTX2, CD22, LIPC, SELPLG	254	354	12983	1.87707	1	0.667192	49.261
SMART	SM00280:KAZAL	4	1.17302	0.0462555	SPINK9, SLCO1B3, SLCO1A2, SPINK4	160	46	9079	4.93424	0.998405	0.724227	42.6474
SP_PIR_KEYWORDS	Protease	15	4.39883	0.0476668	KEL, ADAMTS16, MMP9, PM20D1, CAPN3, MMP13, CTSL1, MMP12, PROC, CPE, CAPN14, PRSS27, LTF, C2, TMPRSS11BNL	338	484	19235	1.76369	1	0.393452	49.2604
GOTERM_CC_FAT	GO:0016459~myosin complex	5	1.46628	0.0483797	MYBPC2, MYOM2, MYBPC1, MYL1, MYLPF	271	65	12782	3.62816	0.999999	0.465609	48.0538
GOTERM_BP_FAT	GO:0008217~regulation of blood pressure	6	1.75953	0.0485194	ACSM3, UTS2, AVPR1A, CARTPT, NOS2, ADIPOQ	269	100	13528	3.0174	1	0.722158	56.9084
GOTERM_BP_FAT	GO:0051046~regulation of secretion	9	2.6393	0.0485337	LEP, SAA1, AVPR1A, CARTPT, SCG5, NOS2, DPH3, ADIPOQ, ACVR1C	269	202	13528	2.24064	1	0.717061	56.9194
GOTERM_BP_FAT	GO:0006812~cation transport	18	5.27859	0.0485893	SLC9A9, CPT1B, STEAP4, CACNA2D1, KCNAB2, TRPA1, SLC38A6, ATP1B4, TCN1, CACNA1S, SLN, ATP2A1, TRPV5, RYR1, CACNA1H, LTF, CP, SCNN1D	269	553	13528	1.63692	1	0.712332	56.9619
SP_PIR_KEYWORDS	retinitis pigmentosa	4	1.17302	0.0490844	USH1G, RPE65, PHYH, PEX7	338	47	19235	4.84326	1	0.394686	50.2995
SP_PIR_KEYWORDS	nad	8	2.34604	0.0492893	AKR1C3, ART3, STEAP4, SORD, HSD17B13, HSD17B6, SDR16C6, RDH16	338	189	19235	2.40882	1	0.388325	50.4481
SP_PIR_KEYWORDS	glycosidase	5	1.46628	0.0499982	HYAL2, LYG2, GLA, LYZ, GLB1L2	338	79	19235	3.60179	1	0.385313	50.9589
UP_SEQ_FEATURE	domain:Ig-like C2-type 1	8	2.34604	0.0505026	ADAMTSL1, MYBPC2, MYOM2, MYBPC1, CD22, CD4, NEGR1, MYOT	337	190	19113	2.38801	1	0.939431	57.7719
INTERPRO	IPR002477:Peptidoglycan binding-like	3	0.879765	0.0508111	MMP9, MMP13, MMP12	305	20	16659	8.19295	1	0.840203	53.9674
INTERPRO	IPR002350:Proteinase inhibitor I1, Kazal	4	1.17302	0.0513787	SPINK9, SLCO1B3, SLCO1A2, SPINK4	305	46	16659	4.74954	1	0.827483	54.3752
SP_PIR_KEYWORDS	adipose tissue	2	0.58651	0.0516476	LEP, ADIPOQ	338	3	19235	37.9389	1	0.388078	52.1286
UP_SEQ_FEATURE	glycosylation site:N-linked (GlcNAc...); partial; atypical	2	0.58651	0.0518199	DLK1, PROC	337	3	19113	37.8101	1	0.93795	58.7361
UP_SEQ_FEATURE	region of interest:5 X 10 AA approximate repeats	2	0.58651	0.0518199	KRTAP13-2, KRTAP13-1	337	3	19113	37.8101	1	0.93795	58.7361
UP_SEQ_FEATURE	metal ion-binding site:Calcium 3; via carbonyl oxygen	3	0.879765	0.0519441	MMP9, MMP13, MMP12	337	21	19113	8.10216	1	0.932374	58.8259
GOTERM_BP_FAT	GO:0010035~response to inorganic substance	9	2.6393	0.0522728	S100A7, EEF1A2, TRPA1, AVPR1A, TTN, PPP1R15B, CAPN3, MB, MT3	269	205	13528	2.20785	1	0.733949	59.697
UP_SEQ_FEATURE	domain:Ig-like C2-type 2	8	2.34604	0.0523098	ADAMTSL1, MYBPC2, MYOM2, MYBPC1, CD22, CD4, NEGR1, MYOT	337	191	19113	2.3755	1	0.927612	59.0893
GOTERM_BP_FAT	GO:0007267~cell-cell signaling	19	5.57185	0.0530032	UTS2, STC2, PCDHB6, TBX5, IL18, CXCL9, CNP, FGF21, GRIA4, CXCL10, LEP, GABRR2, WISP2, NPTX2, CXCL13, SIX1, CARTPT, SRD5A2, CHAT	269	600	13528	1.59252	1	0.734044	60.2195
GOTERM_CC_FAT	GO:0042383~sarcolemma	5	1.46628	0.0530422	CACNA2D1, RYR1, ESR1, CACNA1S, MYOT	271	67	12782	3.51985	1	0.482501	51.3166
GOTERM_BP_FAT	GO:0050879~multicellular organismal movement	3	0.879765	0.0535858	TNNC2, TNNI2, MB	269	19	13528	7.94052	1	0.733144	60.6318
GOTERM_BP_FAT	GO:0050881~musculoskeletal movement	3	0.879765	0.0535858	TNNC2, TNNI2, MB	269	19	13528	7.94052	1	0.733144	60.6318
SP_PIR_KEYWORDS	ionic channel	11	3.22581	0.054396	GABRR2, CACNA2D1, P2RX6, KCNAB2, RYR1, TRPV5, CACNA1H, GRIA4, CACNA1S, SCNN1D, PKD1L2	338	318	19235	1.96853	1	0.397088	54.0202
GOTERM_MF_FAT	GO:0003779~actin binding	12	3.51906	0.0547603	MYBPC2, NRAP, XIRP1, SPTBN5, TNNC2, MYBPC1, XIRP2, ABRA, TTN, LMOD2, MYOT, TNNI2	254	326	12983	1.8815	1	0.717324	55.7173
UP_SEQ_FEATURE	domain:Hemopexin-like 3	3	0.879765	0.0564914	MMP9, MMP13, MMP12	337	22	19113	7.73388	1	0.936265	61.9908
UP_SEQ_FEATURE	domain:Hemopexin-like 4	3	0.879765	0.0564914	MMP9, MMP13, MMP12	337	22	19113	7.73388	1	0.936265	61.9908
GOTERM_MF_FAT	GO:0008233~peptidase activity	18	5.27859	0.0568377	ADAMTSL1, KEL, MMP9, ADAMTS16, PM20D1, HP, MMP13, CAPN3, CTSL1, MMP12, PROC, CPE, CAPN14, PRSS27, LTF, C2, TMPRSS11BNL, PRSS35	254	574	12983	1.60288	1	0.715811	57.1043
GOTERM_MF_FAT	GO:0016878~acid-thiol ligase activity	3	0.879765	0.0570848	ACSM3, ACSM1, SLC27A2	254	20	12983	7.66713	1	0.702755	57.2666
INTERPRO	IPR016040:NAD(P)-binding domain	7	2.05279	0.057205	FAR2, STEAP4, HSD17B1, HSD17B13, HSD17B6, RDH16, WWOX	305	150	16659	2.54892	1	0.845009	58.3711
GOTERM_MF_FAT	GO:0043023~ribosomal large subunit binding	2	0.58651	0.0573336	RBM3, NPM1	254	3	12983	34.0761	1	0.690183	57.4294
GOTERM_BP_FAT	GO:0007621~negative regulation of female receptivity	2	0.58651	0.0582669	PPP1R1B, AVPR1A	269	3	13528	33.5266	1	0.758411	63.801
GOTERM_BP_FAT	GO:0051657~maintenance of organelle location	2	0.58651	0.0582669	ALB, ATP2A1	269	3	13528	33.5266	1	0.758411	63.801
GOTERM_BP_FAT	GO:0006805~xenobiotic metabolic process	3	0.879765	0.058781	UGT1A6, NCEH1, S100A12	269	20	13528	7.54349	1	0.756911	64.134
GOTERM_BP_FAT	GO:0060341~regulation of cellular localization	10	2.93255	0.0594535	LEP, SAA1, AVPR1A, CARTPT, SCG5, NOS2, DPH3, ADIPOQ, CD27, ACVR1C	269	248	13528	2.02782	1	0.75639	64.5653
INTERPRO	IPR002401:Cytochrome P450, E-class, group I	4	1.17302	0.0599584	CYP2U1, CYP4A11, CYP2B6, CYP4F3	305	49	16659	4.45875	1	0.844913	60.1437
GOTERM_CC_FAT	GO:0032982~myosin filament	3	0.879765	0.0600429	MYBPC2, MYOM2, MYBPC1	271	19	12782	7.44727	1	0.511909	55.8615
GOTERM_MF_FAT	GO:0008009~chemokine activity	4	1.17302	0.0601518	CXCL13, CXCL9, CCL19, CXCL10	254	46	12983	4.44471	1	0.694435	59.2336
SMART	SM00120:HX	3	0.879765	0.0606542	MMP9, MMP13, MMP12	160	23	9079	7.40136	0.999799	0.757872	52.0268
SP_PIR_KEYWORDS	iron transport	3	0.879765	0.060808	STEAP4, LTF, HP	338	23	19235	7.42282	1	0.42572	58.167
KEGG_PATHWAY	hsa00071:Fatty acid metabolism	4	1.17302	0.0608093	CPT1B, CYP4A11, ACSL1, ACSL5	116	40	5085	4.38362	0.999112	0.68997	50.8931
UP_SEQ_FEATURE	domain:Hemopexin-like 1	3	0.879765	0.0611718	MMP9, MMP13, MMP12	337	23	19113	7.39763	1	0.944862	65.0087
UP_SEQ_FEATURE	domain:Hemopexin-like 2	3	0.879765	0.0611718	MMP9, MMP13, MMP12	337	23	19113	7.39763	1	0.944862	65.0087
UP_SEQ_FEATURE	lipid moiety-binding region:GPI-anchor amidated glycine	3	0.879765	0.0611718	LYPD2, HYAL2, NEGR1	337	23	19113	7.39763	1	0.944862	65.0087
SP_PIR_KEYWORDS	Lectin	7	2.05279	0.0613952	ASGR1, ZG16B, NPTX2, LGALS9C, CD22, SELPLG, PKD1L2	338	159	19235	2.5054	1	0.421732	58.5289
GOTERM_BP_FAT	GO:0000302~response to reactive oxygen species	5	1.46628	0.0614736	S100A7, TRPA1, PPP1R15B, MB, MT3	269	75	13528	3.35266	1	0.763721	65.8317
SP_PIR_KEYWORDS	heme	6	1.75953	0.0618453	CYP2U1, CYP4A11, CYP2B6, CYP4F3, NOS2, MB	338	121	19235	2.8219	1	0.417175	58.8043
GOTERM_BP_FAT	GO:0001816~cytokine production	4	1.17302	0.0625878	IL18, FABP4, CD4, PTAFR	269	46	13528	4.37304	1	0.765643	66.5118
PIR_SUPERFAMILY	PIRSF005108:dynamin-related, VPS1	2	0.58651	0.0631261	MX1, MX2	160	3	7396	30.8167	0.999996	0.984259	55.5645
GOTERM_BP_FAT	GO:0006026~aminoglycan catabolic process	3	0.879765	0.0641419	HYAL2, LYG2, CHI3L2	269	21	13528	7.18428	1	0.769918	67.4393
GOTERM_BP_FAT	GO:0009409~response to cold	3	0.879765	0.0641419	RBM3, IL18, TRPA1	269	21	13528	7.18428	1	0.769918	67.4393
UP_SEQ_FEATURE	domain:Ig-like C2-type 3	6	1.75953	0.0643411	MYBPC2, MYOM2, MYBPC1, CD22, CD4, NEGR1	337	122	19113	2.78927	1	0.948354	66.9227
SP_PIR_KEYWORDS	lipid degradation	5	1.46628	0.0643951	DDHD1, NCEH1, PLA2G4F, LIPC, PLA2G4D	338	86	19235	3.30862	1	0.423573	60.3327
GOTERM_MF_FAT	GO:0046983~protein dimerization activity	17	4.98534	0.0647492	BATF3, IKZF1, USH1G, PM20D1, ADIPOQ, ASGR1, VWF, ZBED1, P2RX6, GLA, HAND2, ATP2A1, NPM1, ENO3, CD4, NOS2, WWOX	254	542	12983	1.60321	1	0.708763	62.0249
INTERPRO	IPR018486:Hemopexin/matrixin, conserved site	3	0.879765	0.0653043	MMP9, MMP13, MMP12	305	23	16659	7.12431	1	0.856747	63.3859
INTERPRO	IPR018487:Hemopexin/matrixin, repeat	3	0.879765	0.0653043	MMP9, MMP13, MMP12	305	23	16659	7.12431	1	0.856747	63.3859
INTERPRO	IPR000585:Hemopexin/matrixin	3	0.879765	0.0653043	MMP9, MMP13, MMP12	305	23	16659	7.12431	1	0.856747	63.3859
GOTERM_BP_FAT	GO:0009615~response to virus	6	1.75953	0.0654712	CCL19, RSAD2, IFI44, MX1, MX2, IFNGR2	269	109	13528	2.76825	1	0.772832	68.2133
GOTERM_CC_FAT	GO:0043025~cell soma	8	2.34604	0.0657392	P2RX6, EEF1A2, ESR1, CACNA1H, NRSN2, GRIA4, NEGR1, CHAT	271	168	12782	2.246	1	0.530532	59.2666
GOTERM_MF_FAT	GO:0008237~metallopeptidase activity	8	2.34604	0.0668771	ADAMTSL1, CPE, KEL, MMP9, ADAMTS16, PM20D1, MMP13, MMP12	254	183	12983	2.2345	1	0.708178	63.2557
GOTERM_BP_FAT	GO:0007204~elevation of cytosolic calcium ion concentration	6	1.75953	0.0675355	KNG1, SAA1, CXCL13, CCR3, AVPR1A, RYR1	269	110	13528	2.74309	1	0.779437	69.3811
GOTERM_MF_FAT	GO:0008092~cytoskeletal protein binding	16	4.69208	0.0686329	MYBPC2, ACTA1, TNNC2, SPTBN5, MYBPC1, MYOZ1, TTN, MYOT, TNNI2, TNKS1BP1, ANK1, XIRP1, NRAP, XIRP2, ABRA, LMOD2	254	504	12983	1.62267	1	0.70564	64.2432
GOTERM_CC_FAT	GO:0005625~soluble fraction	12	3.51906	0.0690127	WISP2, YARS, SORD, ACSL1, PYGM, STMN2, CXCL13, FBP1, FABP4, DLK1, FGF21, CTSL1	271	313	12782	1.80828	1	0.534481	61.1118
UP_SEQ_FEATURE	short sequence motif:Cell attachment site	5	1.46628	0.069541	VWF, SEMA7A, BAI1, PCDH17, CHST1	337	88	19113	3.22245	1	0.955839	69.8514
GOTERM_BP_FAT	GO:0005976~polysaccharide metabolic process	6	1.75953	0.0696356	PHKA2, HYAL2, LYG2, PYGM, CHI3L2, CHST1	269	111	13528	2.71838	1	0.785894	70.5276
GOTERM_BP_FAT	GO:0009395~phospholipid catabolic process	3	0.879765	0.06966	PLA2G4F, LIPC, PLA2G4D	269	22	13528	6.85772	1	0.782002	70.5407
SP_PIR_KEYWORDS	cell adhesion	13	3.81232	0.0700673	AMTN, MYBPC2, PCDHB6, MYBPC1, ITGAE, PCDH17, APLP1, VWF, WISP2, BAI1, CD22, NEGR1, SELPLG	338	422	19235	1.7531	1	0.444958	63.5459
SP_PIR_KEYWORDS	gpi-anchor	6	1.75953	0.0709464	LYPD2, ART3, HYAL2, SEMA7A, NTNG1, NEGR1	338	126	19235	2.70992	1	0.442451	64.0218
INTERPRO	IPR009311:Interferon-induced 6-16	2	0.58651	0.071026	IFI27L1, IFI6	305	4	16659	27.3098	1	0.868356	66.5824
SP_PIR_KEYWORDS	zymogen	8	2.34604	0.0712661	CPE, MMP9, ADAMTS16, PRSS27, MMP13, MMP12, CTSL1, PROC	338	206	19235	2.21003	1	0.437407	64.1934
GOTERM_BP_FAT	GO:0019216~regulation of lipid metabolic process	6	1.75953	0.0717716	LEP, CPT1B, ACSL1, AVPR1A, GFI1, ADIPOQ	269	112	13528	2.69411	1	0.788282	71.6522
GOTERM_MF_FAT	GO:0070011~peptidase activity, acting on L-amino acid peptides	17	4.98534	0.071853	ADAMTSL1, KEL, MMP9, ADAMTS16, PM20D1, HP, CAPN3, MMP13, CTSL1, MMP12, PROC, CPE, CAPN14, PRSS27, LTF, C2, PRSS35	254	549	12983	1.58277	1	0.710948	65.9903
UP_SEQ_FEATURE	domain:Ig-like C2-type 5	4	1.17302	0.0724051	MYBPC2, MYOM2, MYBPC1, CD22	337	55	19113	4.12474	1	0.957701	71.3586
GOTERM_BP_FAT	GO:0019217~regulation of fatty acid metabolic process	4	1.17302	0.0728079	CPT1B, ACSL1, AVPR1A, ADIPOQ	269	49	13528	4.1053	1	0.789285	72.1832
GOTERM_BP_FAT	GO:0009410~response to xenobiotic stimulus	3	0.879765	0.075327	UGT1A6, NCEH1, S100A12	269	23	13528	6.55956	1	0.796997	73.4351
GOTERM_BP_FAT	GO:0055007~cardiac muscle cell differentiation	3	0.879765	0.075327	XIRP1, TBX5, TTN	269	23	13528	6.55956	1	0.796997	73.4351
GOTERM_BP_FAT	GO:0045777~positive regulation of blood pressure	3	0.879765	0.075327	AVPR1A, CARTPT, ADIPOQ	269	23	13528	6.55956	1	0.796997	73.4351
GOTERM_BP_FAT	GO:0005996~monosaccharide metabolic process	9	2.6393	0.0754771	PHKA2, LEP, SORD, FUT8, PYGM, FBP1, ENO3, ADIPOQ, CHST1	269	222	13528	2.03878	1	0.793916	73.508
GOTERM_MF_FAT	GO:0050327~testosterone 17-beta-dehydrogenase activity	2	0.58651	0.0757076	AKR1C3, HSD17B6	254	4	12983	25.5571	1	0.719019	67.9771
GOTERM_BP_FAT	GO:0032102~negative regulation of response to external stimulus	4	1.17302	0.0763702	LEP, SAA1, CARTPT, ADIPOQ	269	50	13528	4.0232	1	0.79418	73.9378
GOTERM_BP_FAT	GO:0032096~negative regulation of response to food	2	0.58651	0.0769275	LEP, CARTPT	269	4	13528	25.145	1	0.792965	74.2027
GOTERM_BP_FAT	GO:0043501~skeletal muscle adaptation	2	0.58651	0.0769275	ACTA1, CACNA1S	269	4	13528	25.145	1	0.792965	74.2027
GOTERM_BP_FAT	GO:0032099~negative regulation of appetite	2	0.58651	0.0769275	LEP, CARTPT	269	4	13528	25.145	1	0.792965	74.2027
GOTERM_CC_FAT	GO:0005891~voltage-gated calcium channel complex	3	0.879765	0.0778609	CACNA2D1, CACNA1H, CACNA1S	271	22	12782	6.43173	1	0.565956	65.72
BIOCARTA	h_nktPathway:Selective expression of chemokine receptors during T-cell polarization	3	0.879765	0.0782418	CCR3, CD4, IFNGR2	28	25	1437	6.15857	0.996074	0.937342	56.7497
GOTERM_CC_FAT	GO:0042175~nuclear envelope-endoplasmic reticulum network	11	3.22581	0.0794083	AWAT2, CYP2U1, GUCY2F, CYP4A11, PIGM, CYP2B6, ATP2A1, RYR1, CD4, CYP4F3, HPD	271	284	12782	1.82685	1	0.560218	66.472
UP_SEQ_FEATURE	domain:Fibronectin type-III 2	6	1.75953	0.0796071	MYBPC2, MYOM2, MYBPC1, TTN, IFNGR2, EPHA3	337	130	19113	2.61762	1	0.966515	74.8416
UP_SEQ_FEATURE	region of interest:Linker	3	0.879765	0.0811068	PAK7, CAPN14, CAPN3	337	27	19113	6.30168	1	0.965689	75.515
GOTERM_BP_FAT	GO:0050873~brown fat cell differentiation	3	0.879765	0.081135	FABP4, ADIPOQ, MB	269	24	13528	6.28625	1	0.807229	76.1224
UP_SEQ_FEATURE	domain:Fibronectin type-III 1	6	1.75953	0.0816406	MYBPC2, MYOM2, MYBPC1, TTN, IFNGR2, EPHA3	337	131	19113	2.59764	1	0.963425	75.7505
INTERPRO	IPR017973:Cytochrome P450, C-terminal region	4	1.17302	0.0823565	CYP2U1, CYP4A11, CYP2B6, CYP4F3	305	56	16659	3.90141	1	0.89636	72.159
SP_PIR_KEYWORDS	glycosyltransferase	8	2.34604	0.0833251	ART3, UGT1A6, ST6GAL2, PIGM, FUT8, PYGM, ALG11, ST6GALNAC1	338	214	19235	2.12741	1	0.485009	70.1382
GOTERM_BP_FAT	GO:0006006~glucose metabolic process	7	2.05279	0.0838944	PHKA2, LEP, SORD, PYGM, FBP1, ENO3, ADIPOQ	269	153	13528	2.30085	1	0.814747	77.3075
UP_SEQ_FEATURE	domain:EF-hand 3	5	1.46628	0.0840013	TNNC2, CAPN14, MYL1, MYLPF, CAPN3	337	94	19113	3.01676	1	0.963961	76.7669
GOTERM_BP_FAT	GO:0007610~behavior	15	4.39883	0.0842329	IL18, CXCL9, CCL19, CNP, CXCL10, LEP, CXCL13, PPP1R1B, SAA1, CCR3, AVPR1A, CARTPT, GFI1, CHAT, PTAFR	269	469	13528	1.60842	1	0.812643	77.449
KEGG_PATHWAY	hsa00140:Steroid hormone biosynthesis	4	1.17302	0.0848964	AKR1C3, UGT1A6, HSD17B1, SRD5A2	116	46	5085	3.81184	0.999952	0.758162	63.4207
GOTERM_BP_FAT	GO:0051480~cytosolic calcium ion homeostasis	6	1.75953	0.0853318	KNG1, SAA1, CXCL13, CCR3, AVPR1A, RYR1	269	118	13528	2.55712	1	0.813503	77.9027
SP_PIR_KEYWORDS	coenzyme A	3	0.879765	0.085868	CPT1B, ACSL1, CHAT	338	28	19235	6.09732	1	0.489123	71.2686
GOTERM_MF_FAT	GO:0005125~cytokine activity	8	2.34604	0.0870299	SLURP1, CXCL13, IL18, IL1RN, CXCL9, CCL19, ADIPOQ, CXCL10	254	195	12983	2.09699	1	0.759185	73.2061
GOTERM_BP_FAT	GO:0045444~fat cell differentiation	4	1.17302	0.0875041	STEAP4, FABP4, ADIPOQ, MB	269	53	13528	3.79547	1	0.818367	78.7744
GOTERM_MF_FAT	GO:0020037~heme binding	6	1.75953	0.0877491	CYP2U1, CYP4A11, CYP2B6, CYP4F3, NOS2, MB	254	121	12983	2.53459	1	0.751872	73.5098
SP_PIR_KEYWORDS	EF hand	4	1.17302	0.0880359	TNNC2, S100A7, CAPN3, S100A12	338	60	19235	3.79389	1	0.491546	72.2007
SMART	SM00235:ZnMc	3	0.879765	0.0910035	MMP9, MMP13, MMP12	160	29	9079	5.87004	0.999998	0.843353	67.3741
SP_PIR_KEYWORDS	acute phase	3	0.879765	0.0911987	SAA1, HP, CP	338	29	19235	5.88706	1	0.497863	73.5105
UP_SEQ_FEATURE	repeat:TPR 4	5	1.46628	0.0917408	IFIT3, IFIT1, TTC37, TTN, TTC6	337	97	19113	2.92346	1	0.971437	79.8254
SP_PIR_KEYWORDS	lipid synthesis	5	1.46628	0.0935171	AWAT2, FAR2, DGAT2L6, MOGAT1, HSD17B1	338	98	19235	2.90348	1	0.500637	74.434
GOTERM_BP_FAT	GO:0006702~androgen biosynthetic process	2	0.58651	0.0952197	HSD17B6, SRD5A2	269	5	13528	20.116	1	0.841867	81.616
GOTERM_BP_FAT	GO:0030240~muscle thin filament assembly	2	0.58651	0.0952197	ACTA1, TTN	269	5	13528	20.116	1	0.841867	81.616
GOTERM_BP_FAT	GO:0060180~female mating behavior	2	0.58651	0.0952197	PPP1R1B, AVPR1A	269	5	13528	20.116	1	0.841867	81.616
GOTERM_BP_FAT	GO:0045924~regulation of female receptivity	2	0.58651	0.0952197	PPP1R1B, AVPR1A	269	5	13528	20.116	1	0.841867	81.616
GOTERM_BP_FAT	GO:0032101~regulation of response to external stimulus	7	2.05279	0.0965054	LEP, KNG1, SAA1, CARTPT, FABP4, ADIPOQ, PROC	269	159	13528	2.21402	1	0.842927	82.0532
GOTERM_MF_FAT	GO:0033764~steroid dehydrogenase activity, acting on the CH-OH group of donors, NAD or NADP as acceptor	3	0.879765	0.096601	AKR1C3, HSD17B1, HSD17B6	254	27	12983	5.67935	1	0.776365	76.9943
SP_PIR_KEYWORDS	obesity	3	0.879765	0.0966235	LEP, CARTPT, ADIPOQ	338	30	19235	5.69083	1	0.50632	75.6245
UP_SEQ_FEATURE	repeat:TPR 3	6	1.75953	0.0966366	IFIT3, IFIT1, FKBP5, TTC37, TTN, TTC6	337	138	19113	2.46588	1	0.97442	81.5602
GOTERM_CC_FAT	GO:0034364~high-density lipoprotein particle	3	0.879765	0.0970892	SAA1, HP, LIPC	271	25	12782	5.65993	1	0.624334	74.0481
UP_SEQ_FEATURE	metal ion-binding site:Calcium 3	3	0.879765	0.0971764	ASGR1, MMP9, MMP12	337	30	19113	5.67151	1	0.972724	81.7426
INTERPRO	IPR006026:Peptidase, metallopeptidases	3	0.879765	0.0976797	MMP9, MMP13, MMP12	305	29	16659	5.65031	1	0.925914	78.3288
SP_PIR_KEYWORDS	vision	6	1.75953	0.0978325	GUCY2F, LRAT, USH1G, RPE65, PHYH, PEX7	338	139	19235	2.45647	1	0.504716	76.0738
GOTERM_BP_FAT	GO:0031667~response to nutrient levels	8	2.34604	0.0980462	LEP, UGT1A6, ACSL1, STC2, ALB, CARTPT, CP, ADIPOQ	269	197	13528	2.04223	1	0.844759	82.5643
GOTERM_BP_FAT	GO:0006935~chemotaxis	7	2.05279	0.0987008	SAA1, CXCL13, CCR3, CXCL9, CCL19, PTAFR, CXCL10	269	160	13528	2.20019	1	0.843819	82.7772
GOTERM_BP_FAT	GO:0042330~taxis	7	2.05279	0.0987008	SAA1, CXCL13, CCR3, CXCL9, CCL19, PTAFR, CXCL10	269	160	13528	2.20019	1	0.843819	82.7772
INTERPRO	IPR006025:Peptidase M, neutral zinc metallopeptidases, zinc-binding site	5	1.46628	0.0987339	KEL, MMP9, ADAMTS16, MMP13, MMP12	305	96	16659	2.84477	1	0.920412	78.7025
GOTERM_BP_FAT	GO:0009612~response to mechanical stimulus	4	1.17302	0.0992774	ACTA1, TRPA1, GFI1, MMP13	269	56	13528	3.59214	1	0.842653	82.9628
GOTERM_MF_FAT	GO:0010843~promoter binding	4	1.17302	0.0995613	IKZF1, HAND2, ESR1, GFI1	254	57	12983	3.58696	1	0.777579	78.061
